# Supplementary material for: Structural variation, magnetism and single-source deposition of lanthanide-containing polyoxotitanates
Source: Royal Society of Chemistry journal article supplement (doi:10.1039/d3dt02553e), 2023-01-01
Supplement: d3dt02553e1.pdf [file d3dt02553e1.pdf]

# Supplementary Information for

## Structural Variation, Magnetism and Single-source Deposition of Lanthanide-containing Polyoxotitanates

Rosa Müller,<sup>a</sup> Olivia Georghiades,<sup>a</sup> Joshua D. Bocarsly,<sup>a</sup> Farheen N. Sayed,<sup>a</sup> Victor Riesgo Gonzalez,<sup>a</sup> Andrew D. Bond,<sup>a</sup> Clare P. Grey<sup>a</sup> and Dominic S. Wright\*<sup>a</sup>

<sup>a</sup> The Yusuf Hamied Department of Chemistry, Cambridge University, Lensfield Road, Cambridge CB2 1EW, UK. E-mail: [dsw1000@cam.ac.uk](mailto:dsw1000@cam.ac.uk); Tel: +44 (0)1223 763122.

|                                                             |           |
|-------------------------------------------------------------|-----------|
| <b>Synthesis of Ln-POTs</b> .....                           | <b>2</b>  |
| Powder diffraction data .....                               | 2         |
| IR data.....                                                | 3         |
| <b>Crystallographic data</b> .....                          | <b>4</b>  |
| Analysis of the TiO <sub>6</sub> octahedral geometry .....  | 5         |
| <b>Magnetic Measurements (AC susceptibility data)</b> ..... | <b>9</b>  |
| <b>Decomposition Studies</b> .....                          | <b>10</b> |
| TGA data .....                                              | 10        |
| Raman spectra.....                                          | 10        |
| SEM images .....                                            | 12        |
| EDX data .....                                              | 14        |
| <b>Rietveld Refinement</b> .....                            | <b>16</b> |
| <b>UV-Vis measurements</b> .....                            | <b>19</b> |
| Linear extrapolation .....                                  | 19        |
| Direct band gap semiconductor model .....                   | 24        |

## Synthesis of Ln-POTs

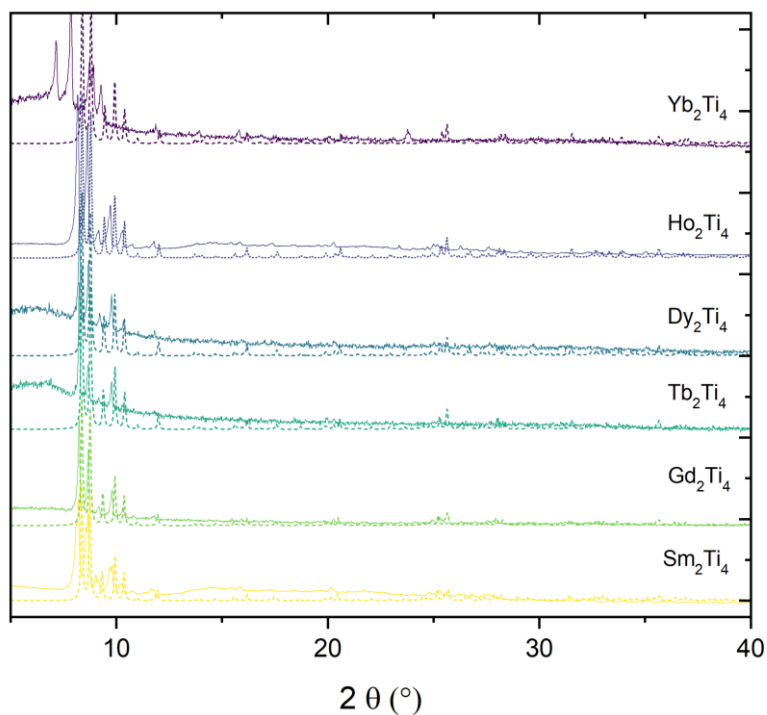

**Figure S1** Experimental powder diffraction patterns of the newly synthesised  $\text{Ln}_2\text{Ti}_4$ -cages ( $\text{Ln} = \text{Sm}, \text{Gd}, \text{Tb}, \text{Dy}, \text{Ho}, \text{Yb}$ ) and their predicted patterns (dashed line) calculated from the single crystal data. Some impurities in form of  $\text{Ti}_{16}\text{O}_{16}(\text{OEt})_{32}$ , indicated by low-angle diffraction peaks are present in case of  $\text{Yb}_2\text{Ti}_4$ . For  $\text{Tm}_2\text{Ti}_4$  not enough sample for bulk analysis was obtained.

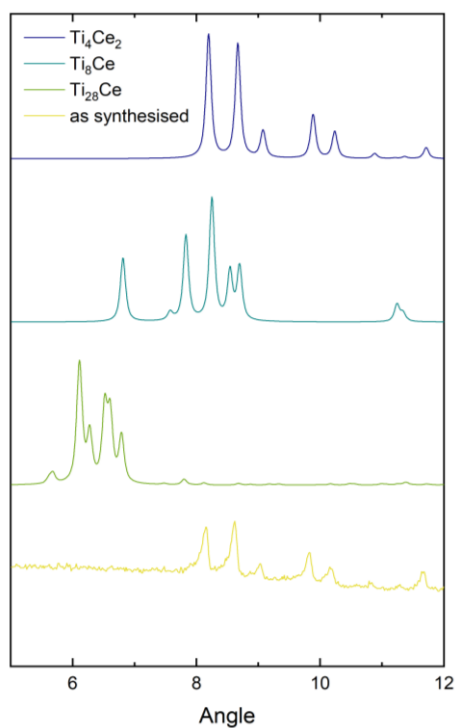

**Figure S2** Comparison of the experimental powder diffraction data obtained for the synthesised Ce-POTs with calculated diffraction patterns of the possible reaction products  $\text{Ti}_{28}\text{Ce}$ ,  $\text{Ti}_8\text{Ce}$  and  $\text{Ti}_4\text{Ce}_2$ . The smallest cage type  $\text{Ti}_4\text{Ce}_2$  is found to be the main component.

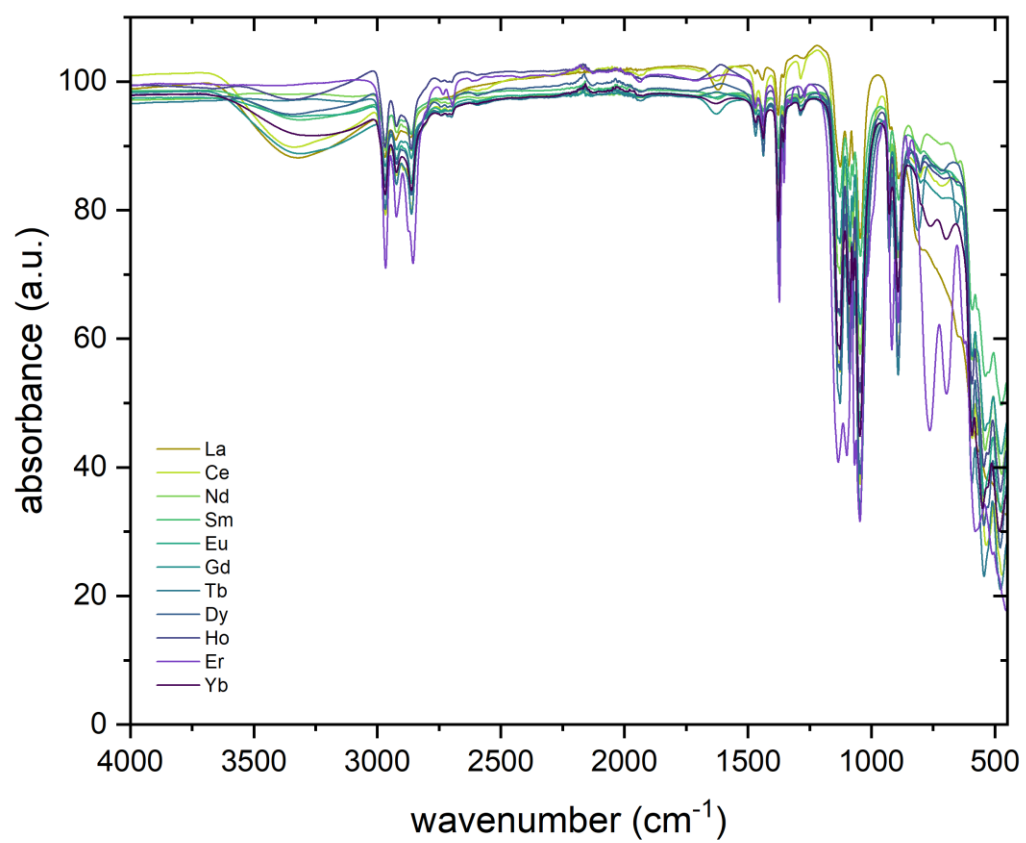

**Figure S3** IR spectra of the complete series of Ln-POTs (Ln = La-Er, Yb). Not enough sample was obtained in case of Ln = Tm. A distinct spectrum is observed for Ln = Er (**Ti<sub>8</sub>Er**).

## Crystallographic data

**Table S1** Crystallographic and refinement data for  $Ti_4Ln_2$  ( $Ln = Sm, Gd, Tb, Dy, Ho, Er, Tm, Yb$ ).

|                                               | $Ti_4Sm_2$                       | $Ti_4Gd_2$                       | $Ti_4Tb_2$                       | $Ti_4Dy_2$                       | $Ti_4Ho_2$                       | $Ti_4Er_2$                       | $Ti_4Tm_2$                       | $Ti_4Yb_2$                       |
|-----------------------------------------------|----------------------------------|----------------------------------|----------------------------------|----------------------------------|----------------------------------|----------------------------------|----------------------------------|----------------------------------|
| CCDC number                                   | 2283720                          | 2283721                          | 2283722                          | 2283715                          | 2283717                          | 2283719                          | 2283718                          | 2283716                          |
| Cambridge data number                         | DW_B1_0414                       | DW_B2_0373                       | DW_B1_0430                       | DW_B2_0375                       | DW_B1_0431                       | DW_B1_0463                       | DW_B1_0479                       | DW_B1_0396                       |
| Chemical formula                              | $C_{36}H_{92}Cl_2O_{20}Sm_2Ti_4$ | $C_{36}H_{92}Cl_2O_{20}Gd_2Ti_4$ | $C_{36}H_{92}Cl_2O_{20}Tb_2Ti_4$ | $C_{36}H_{92}Cl_2O_{20}Dy_2Ti_4$ | $C_{36}H_{92}Cl_2O_{20}Ho_2Ti_4$ | $C_{36}H_{92}Cl_2O_{20}Er_2Ti_4$ | $C_{36}H_{92}Cl_2O_{20}Tm_2Ti_4$ | $C_{36}H_{92}Cl_2O_{20}Yb_2Ti_4$ |
| Formula weight                                | 1408.29                          | 1422.09                          | 1425.43                          | 1432.59                          | 1437.45                          | 1442.11                          | 1445.45                          | 1453.67                          |
| Temperature / K                               | 180(2)                           | 180(2)                           | 180(2)                           | 180(2)                           | 180(2)                           | 180(2)                           | 180(2)                           | 180(2)                           |
| Crystal system                                | monoclinic                       |
| Space group                                   | $P 2_1/n$                        |
| a / Å                                         | 11.9374(4)                       | 11.9414(5)                       | 11.9091(5)                       | 11.9219(5)                       | 11.9118(4)                       | 11.9203(6)                       | 11.9196(4)                       | 11.9050(3)                       |
| b / Å                                         | 18.9359(6)                       | 18.8718(8)                       | 18.8221(8)                       | 18.7644(8)                       | 18.7283(6)                       | 18.7662(10)                      | 18.7621(6)                       | 18.6786(5)                       |
| c / Å                                         | 12.7346(4)                       | 12.7327(5)                       | 12.7415(6)                       | 12.7482(6)                       | 12.7532(4)                       | 12.7290(7)                       | 12.7550(4)                       | 12.7568(4)                       |
| alpha / °                                     | 90                               | 90                               | 90                               | 90                               | 90                               | 90                               | 90                               | 90                               |
| beta / °                                      | 92.3995(12)                      | 92.454(2)                        | 92.592(2)                        | 92.549(2)                        | 92.6111(12)                      | 92.705(3)                        | 92.8718(13)                      | 92.6397(11)                      |
| gamma / °                                     | 90                               | 90                               | 90                               | 90                               | 90                               | 90                               | 90                               | 90                               |
| Unit-cell volume / Å <sup>3</sup>             | 2876.07(16)                      | 2866.8(2)                        | 2853.1(2)                        | 2849.0(2)                        | 2842.13(16)                      | 2844.3(3)                        | 2848.90(16)                      | 2833.70(14)                      |
| Z                                             | 2                                | 2                                | 2                                | 2                                | 2                                | 2                                | 2                                | 2                                |
| Calc. density / g cm <sup>-3</sup>            | 1.626                            | 1.647                            | 1.659                            | 1.670                            | 1.680                            | 1.684                            | 1.685                            | 1.704                            |
| F(000)                                        | 1428                             | 1436                             | 1440                             | 1444                             | 1448                             | 1452                             | 1456                             | 1460                             |
| Radiation type                                | Cu K $\alpha$                    |
| Absorption coefficient / mm <sup>-1</sup>     | 20.963                           | 20.613                           | 17.865                           | 19.716                           | 10.897                           | 11.170                           | 11.517                           | 11.819                           |
| Crystal size / mm <sup>3</sup>                | 0.16 x 0.16 x 0.08               | 0.10 x 0.10 x 0.08               | 0.12 x 0.10 x 0.10               | 0.08 x 0.08 x 0.04               | 0.10 x 0.10 x 0.08               | 0.16 x 0.10 x 0.06               | 0.15 x 0.10 x 0.10               | 0.14 x 0.14 x 0.12               |
| 2 $\theta$ range / °                          | 10.99–133.26                     | 9.37–133.59                      | 11.00–133.28                     | 11.00–133.06                     | 9.44–133.20                      | 8.40–133.41                      | 10.98–133.30                     | 8.40–133.63                      |
| Completeness to max 2 $\theta$                | 0.994                            | 0.993                            | 0.992                            | 0.995                            | 0.992                            | 0.998                            | 0.994                            | 0.999                            |
| No. of reflections measured                   | 28827                            | 49395                            | 41828                            | 28283                            | 31868                            | 40698                            | 47040                            | 46776                            |
| No. of independent reflections                | 5059                             | 5049                             | 5005                             | 5003                             | 4981                             | 5024                             | 5004                             | 5020                             |
| R(int)                                        | 0.0364                           | 0.0435                           | 0.0433                           | 0.0435                           | 0.0312                           | 0.1390                           | 0.0410                           | 0.0500                           |
| No. parameters / restraints                   | 329 / 60                         | 329 / 60                         | 329 / 60                         | 329 / 12                         | 329 / 60                         | 309 / 144                        | 318 / 143                        | 338 / 60                         |
| Final R1 values ( $I > 2\sigma(I)$ )          | 0.0212                           | 0.0183                           | 0.0212                           | 0.0210                           | 0.0206                           | 0.0532                           | 0.0200                           | 0.0244                           |
| Final wR(F <sup>2</sup> ) values (all data)   | 0.0531                           | 0.0448                           | 0.0526                           | 0.0490                           | 0.0505                           | 0.1478                           | 0.0511                           | 0.0591                           |
| Goodness-of-fit on F <sup>2</sup>             | 1.047                            | 1.050                            | 1.066                            | 1.043                            | 1.076                            | 1.023                            | 1.071                            | 1.081                            |
| Largest diff. peak & hole / e Å <sup>-3</sup> | 0.601, -0.802                    | 0.331, -0.576                    | 0.471, -0.702                    | 0.307, -0.410                    | 0.319, -0.545                    | 2.495, -1.245                    | 0.545, -0.917                    | 1.356, -0.882                    |

## Analysis of the TiO<sub>6</sub> octahedral geometry

**Table S2** Continuous Shape Measure (CShM, implemented at: <https://csm.ouproj.org.il/molecule> [I. Tuvi-Arad, G. Alon and D. Avnir]) for Ti<sub>4</sub>Ln<sub>2</sub> cages, quantifying the distortion of the TiO<sub>6</sub> octahedra from regularity. The TiO<sub>6</sub> octahedra were isolated from each structure and compared to a regular octahedron with a central point (7-point comparison). CShM = 0 indicates a regular octahedron. Increasing CShM indicates increasing distortion from the regular octahedron.

|                   | Ti <sub>4</sub> Ce <sub>2</sub><br>ZIWYEM | Ti <sub>4</sub> Nd <sub>2</sub><br>DEJRIV | Ti <sub>4</sub> Sm <sub>2</sub> | Ti <sub>4</sub> Eu <sub>2</sub><br>CURJEG | Ti <sub>4</sub> Gd <sub>2</sub> | Ti <sub>4</sub> Tb <sub>2</sub> | Ti <sub>4</sub> Dy <sub>2</sub> | Ti <sub>4</sub> Ho <sub>2</sub> | Ti <sub>4</sub> Er <sub>2</sub> | Ti <sub>4</sub> Tm <sub>2</sub> | Ti <sub>4</sub> Yb <sub>2</sub> |
|-------------------|-------------------------------------------|-------------------------------------------|---------------------------------|-------------------------------------------|---------------------------------|---------------------------------|---------------------------------|---------------------------------|---------------------------------|---------------------------------|---------------------------------|
| Ti1—O1            | 1.934                                     | 1.936                                     | 1.9371(17)                      | 1.936                                     | 1.9357(15)                      | 1.9338(15)                      | 1.9328(18)                      | 1.9348(13)                      | 1.922(5)                        | 1.9312(16)                      | 1.931(2)                        |
| Ti1—O2            | 2.067                                     | 2.072                                     | 2.0639(17)                      | 2.071                                     | 2.0642(15)                      | 2.0617(16)                      | 2.0635(18)                      | 2.0643(13)                      | 2.051(5)                        | 2.0620(16)                      | 2.056(2)                        |
| Ti1—O4            | 2.178                                     | 2.183                                     | 2.1690(17)                      | 2.168                                     | 2.1674(15)                      | 2.1593(15)                      | 2.1583(16)                      | 2.1554(13)                      | 2.158(5)                        | 2.1482(16)                      | 2.145(2)                        |
| Ti1—O5            | 1.777                                     | 1.789                                     | 1.7888(18)                      | 1.789                                     | 1.7902(15)                      | 1.7890(16)                      | 1.7880(17)                      | 1.7866(14)                      | 1.795(5)                        | 1.7884(17)                      | 1.786(2)                        |
| Ti1—O6            | 1.859                                     | 1.859                                     | 1.8649(18)                      | 1.861                                     | 1.8622(15)                      | 1.8578(15)                      | 1.8582(16)                      | 1.8600(13)                      | 1.845(5)                        | 1.8562(16)                      | 1.856(2)                        |
| Ti1—O10           | 1.987                                     | 1.977                                     | 1.9774(17)                      | 1.981                                     | 1.9773(14)                      | 1.9819(15)                      | 1.9833(16)                      | 1.9827(12)                      | 1.982(5)                        | 1.9890(15)                      | 1.992(2)                        |
| O5—Ti1—O6         | 98.12                                     | 98.99                                     | 98.86(8)                        | 98.51                                     | 98.78(7)                        | 98.73(7)                        | 98.68(8)                        | 98.65(6)                        | 97.9(2)                         | 98.30(8)                        | 98.54(11)                       |
| O5—Ti1—O1         | 99.30                                     | 99.14                                     | 99.09(8)                        | 99.05                                     | 99.10(7)                        | 99.28(7)                        | 99.27(8)                        | 99.38(6)                        | 99.1(3)                         | 99.48(8)                        | 99.43(11)                       |
| O6—Ti1—O1         | 102.61                                    | 103.08                                    | 103.34(8)                       | 103.62                                    | 103.75(7)                       | 103.86(7)                       | 104.17(8)                       | 104.07(6)                       | 104.0(2)                        | 104.09(7)                       | 104.41(10)                      |
| O5—Ti1—O10        | 164.07                                    | 163.24                                    | 163.70(8)                       | 164.05                                    | 163.82(7)                       | 164.14(7)                       | 164.25(8)                       | 164.33(6)                       | 164.3(3)                        | 164.51(8)                       | 164.78(10)                      |
| O6—Ti1—O10        | 96.29                                     | 96.47                                     | 96.33(7)                        | 96.41                                     | 96.37(6)                        | 96.12(6)                        | 96.12(7)                        | 96.12(5)                        | 97.0(2)                         | 96.39(7)                        | 95.97(9)                        |
| O1—Ti1—O10        | 84.07                                     | 83.52                                     | 83.04(7)                        | 82.80                                     | 82.73(6)                        | 82.44(6)                        | 82.18(7)                        | 81.98(5)                        | 82.1(2)                         | 81.60(6)                        | 81.27(9)                        |
| O5—Ti1—O2         | 95.77                                     | 96.04                                     | 96.21(8)                        | 96.41                                     | 96.35(7)                        | 96.47(7)                        | 96.61(8)                        | 96.66(6)                        | 97.3(3)                         | 96.93(8)                        | 97.09(11)                       |
| O6—Ti1—O2         | 95.17                                     | 94.71                                     | 94.79(8)                        | 94.49                                     | 94.58(7)                        | 94.48(7)                        | 94.24(8)                        | 94.26(6)                        | 94.8(2)                         | 94.31(7)                        | 94.14(10)                       |
| O1—Ti1—O2         | 154.72                                    | 154.40                                    | 154.06(7)                       | 154.06                                    | 153.82(6)                       | 153.59(6)                       | 153.45(7)                       | 153.42(5)                       | 153.0(2)                        | 153.18(7)                       | 152.91(9)                       |
| O10—Ti1—O2        | 76.17                                     | 76.23                                     | 76.59(7)                        | 76.78                                     | 76.72(6)                        | 76.79(6)                        | 76.91(7)                        | 77.00(5)                        | 76.5(2)                         | 77.03(6)                        | 77.26(9)                        |
| O5—Ti1—O4         | 93.72                                     | 92.99                                     | 93.20(8)                        | 93.46                                     | 93.29(7)                        | 93.58(7)                        | 93.63(7)                        | 93.65(6)                        | 93.8(2)                         | 93.91(7)                        | 93.91(10)                       |
| O6—Ti1—O4         | 165.69                                    | 165.35                                    | 165.21(7)                       | 165.11                                    | 165.06(6)                       | 164.72(6)                       | 164.52(7)                       | 164.58(6)                       | 165.3(2)                        | 164.71(7)                       | 164.26(9)                       |
| O1—Ti1—O4         | 83.26                                     | 83.14                                     | 83.02(7)                        | 83.07                                     | 82.86(6)                        | 82.90(6)                        | 82.90(7)                        | 82.91(5)                        | 82.7(2)                         | 82.80(6)                        | 82.84(9)                        |
| O10—Ti1—O4        | 71.10                                     | 70.81                                     | 70.93(6)                        | 70.96                                     | 70.90(5)                        | 70.90(6)                        | 70.90(6)                        | 70.95(5)                        | 70.7(2)                         | 70.82(6)                        | 71.02(8)                        |
| O2—Ti1—O4         | 75.59                                     | 75.57                                     | 75.31(7)                        | 75.30                                     | 75.24(6)                        | 75.05(6)                        | 74.96(7)                        | 75.01(5)                        | 74.9(2)                         | 75.03(6)                        | 74.72(9)                        |
| <b>CShM (Oct)</b> | <b>1.037</b>                              | <b>1.073</b>                              | <b>1.088</b>                    | <b>1.090</b>                              | <b>1.104</b>                    | <b>1.109</b>                    | <b>1.122</b>                    | <b>1.125</b>                    | <b>1.152</b>                    | <b>1.139</b>                    | <b>1.145</b>                    |

**Table S3** Continuous Shape Measure (CShM), cont'd. Atoms O8 and O10 form the edge bridged by Ln<sup>3+</sup>: the highlighted O8—Ti2—O10 angle decreases steadily as Ln<sup>3+</sup> gets smaller across the row (atom numbering in Figure S3). This indicates an increase in structural strain along the series of Ti<sub>4</sub>Ln<sub>2</sub> cages.

|                   | Ti <sub>4</sub> Ce <sub>2</sub><br>ZIWYEM | Ti <sub>4</sub> Nd <sub>2</sub><br>DEJRIV | Ti <sub>4</sub> Sm <sub>2</sub> | Ti <sub>4</sub> Eu <sub>2</sub><br>CURJEG | Ti <sub>4</sub> Gd <sub>2</sub> | Ti <sub>4</sub> Tb <sub>2</sub> | Ti <sub>4</sub> Dy <sub>2</sub> | Ti <sub>4</sub> Ho <sub>2</sub> | Ti <sub>4</sub> Er <sub>2</sub> | Ti <sub>4</sub> Tm <sub>2</sub> | Ti <sub>4</sub> Yb <sub>2</sub> |
|-------------------|-------------------------------------------|-------------------------------------------|---------------------------------|-------------------------------------------|---------------------------------|---------------------------------|---------------------------------|---------------------------------|---------------------------------|---------------------------------|---------------------------------|
| Ti2—O2            | 2.020                                     | 2.024                                     | 2.0180(17)                      | 2.023                                     | 2.0187(15)                      | 2.0173(15)                      | 2.0185(17)                      | 2.0150(13)                      | 2.005(5)                        | 2.0168(16)                      | 2.015(2)                        |
| Ti2—O3            | 1.919                                     | 1.918                                     | 1.9195(17)                      | 1.922                                     | 1.9214(15)                      | 1.9181(15)                      | 1.9155(17)                      | 1.9173(13)                      | 1.912(5)                        | 1.9155(16)                      | 1.913(2)                        |
| Ti2—O4            | 2.113                                     | 2.113                                     | 2.1165(17)                      | 2.114                                     | 2.1155(14)                      | 2.1150(15)                      | 2.1141(17)                      | 2.1113(13)                      | 2.104(5)                        | 2.1128(16)                      | 2.108(2)                        |
| Ti2—O7            | 1.791                                     | 1.789                                     | 1.7877(18)                      | 1.790                                     | 1.7911(16)                      | 1.7895(16)                      | 1.7884(18)                      | 1.7912(13)                      | 1.790(6)                        | 1.7913(17)                      | 1.792(2)                        |
| Ti2—O8            | 1.914                                     | 1.916                                     | 1.9135(18)                      | 1.919                                     | 1.9169(15)                      | 1.9143(16)                      | 1.9150(17)                      | 1.9162(13)                      | 1.912(5)                        | 1.9155(16)                      | 1.913(2)                        |
| Ti2—O10           | 2.003                                     | 1.998                                     | 2.0018(16)                      | 2.008                                     | 2.0018(14)                      | 2.0020(15)                      | 2.0033(17)                      | 2.0037(12)                      | 1.990(5)                        | 2.0017(16)                      | 2.005(2)                        |
| O7—Ti2—O8         | 101.56                                    | 102.42                                    | 102.63(8)                       | 102.37                                    | 102.77(7)                       | 102.93(7)                       | 102.87(8)                       | 102.87(6)                       | 103.0(2)                        | 103.04(7)                       | 103.01(10)                      |
| O7—Ti2—O3         | 100.72                                    | 100.96                                    | 101.06(8)                       | 101.00                                    | 100.92(7)                       | 101.05(7)                       | 101.06(8)                       | 101.15(6)                       | 101.3(2)                        | 101.29(7)                       | 101.39(10)                      |
| O8—Ti2—O3         | 95.51                                     | 95.86                                     | 96.39(8)                        | 96.46                                     | 96.63(7)                        | 96.82(7)                        | 97.26(7)                        | 97.32(6)                        | 96.6(2)                         | 97.46(7)                        | 97.86(10)                       |
| O7—Ti2—O10        | 169.94                                    | 169.37                                    | 169.48(8)                       | 169.81                                    | 169.74(6)                       | 169.75(7)                       | 169.88(7)                       | 170.12(6)                       | 170.4(2)                        | 170.30(7)                       | 170.33(10)                      |
| <b>O8—Ti2—O10</b> | <b>84.62</b>                              | <b>84.25</b>                              | <b>83.88(7)</b>                 | <b>83.71</b>                              | <b>83.40(6)</b>                 | <b>83.22(6)</b>                 | <b>82.95(7)</b>                 | <b>82.71(5)</b>                 | <b>82.3(2)</b>                  | <b>82.39(6)</b>                 | <b>82.04(9)</b>                 |
| O3—Ti2—O10        | 86.43                                     | 86.40                                     | 86.24(7)                        | 86.27                                     | 86.32(6)                        | 86.17(6)                        | 86.23(7)                        | 86.03(5)                        | 85.9(2)                         | 85.79(6)                        | 85.90(9)                        |
| O7—Ti2—O2         | 94.19                                     | 93.80                                     | 93.53(8)                        | 93.52                                     | 93.51(7)                        | 93.35(7)                        | 93.21(8)                        | 93.22(6)                        | 93.7(2)                         | 93.22(7)                        | 93.01(10)                       |
| O8—Ti2—O2         | 98.90                                     | 98.94                                     | 99.51(8)                        | 99.68                                     | 99.82(7)                        | 100.10(7)                       | 100.00(7)                       | 100.06(6)                       | 100.5(2)                        | 100.22(7)                       | 100.27(10)                      |
| O3—Ti2—O2         | 156.74                                    | 156.33                                    | 155.50(7)                       | 155.43                                    | 155.13(6)                       | 154.71(7)                       | 154.53(8)                       | 154.36(6)                       | 154.1(2)                        | 153.94(7)                       | 153.64(10)                      |
| O10—Ti2—O2        | 76.90                                     | 76.85                                     | 77.11(7)                        | 77.27                                     | 77.23(6)                        | 77.36(6)                        | 77.51(7)                        | 77.67(5)                        | 77.4(2)                         | 77.79(6)                        | 77.88(9)                        |
| O7—Ti2—O4         | 101.64                                    | 101.48                                    | 101.93(8)                       | 102.39                                    | 102.36(6)                       | 102.44(7)                       | 102.73(7)                       | 102.98(6)                       | 103.1(2)                        | 103.29(7)                       | 103.40(10)                      |
| O8—Ti2—O4         | 156.76                                    | 156.06                                    | 155.40(7)                       | 155.21                                    | 154.84(6)                       | 154.59(6)                       | 154.34(7)                       | 154.11(5)                       | 153.9(2)                        | 153.63(7)                       | 153.51(9)                       |
| O3—Ti2—O4         | 81.51                                     | 80.83                                     | 80.33(7)                        | 80.08                                     | 79.83(6)                        | 79.68(6)                        | 79.45(7)                        | 79.12(5)                        | 79.0(2)                         | 78.89(7)                        | 78.88(9)                        |
| O10—Ti2—O4        | 72.21                                     | 71.91                                     | 71.60(6)                        | 71.60                                     | 71.56(5)                        | 71.47(6)                        | 71.47(6)                        | 71.50(5)                        | 71.7(2)                         | 71.33(6)                        | 71.54(8)                        |
| O2—Ti2—O4         | 78.04                                     | 78.14                                     | 77.44(7)                        | 77.48                                     | 77.34(6)                        | 76.95(6)                        | 76.87(7)                        | 77.01(5)                        | 77.0(2)                         | 76.75(6)                        | 76.34(9)                        |
| <b>CShM (Oct)</b> | <b>1.241</b>                              | <b>1.305</b>                              | <b>1.397</b>                    | <b>1.426</b>                              | <b>1.472</b>                    | <b>1.512</b>                    | <b>1.545</b>                    | <b>1.573</b>                    | <b>1.619</b>                    | <b>1.634</b>                    | <b>1.662</b>                    |

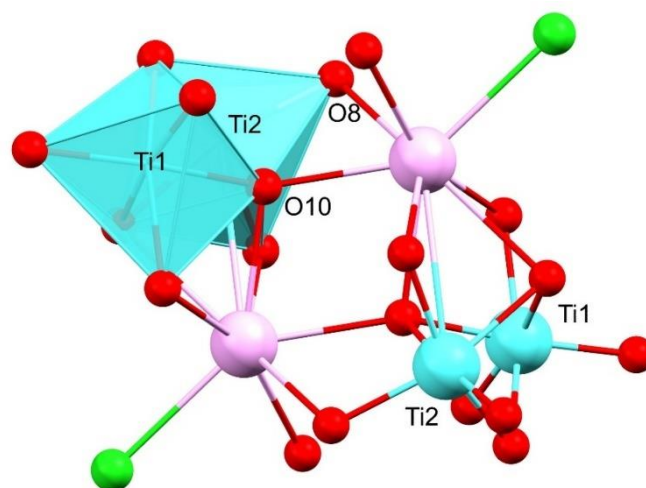

**Figure S4** Detailed polyhedral representation of the metal-oxo core of the  $\text{Ti}_4\text{Ln}_2$  cage. The Ti2 octahedron is the one sharing its edge with  $\text{Ln}^{3+}$  (the “bridging” octahedron), whereas the Ti1 octahedron sits more to the periphery of the complex. The distortion of the Ti2 octahedron is reflected in the O8-Ti2-O10 angle, which shows a steady decrease across the series of lanthanides, as  $\text{Ln}^{3+}$  gets smaller (see Table S4).

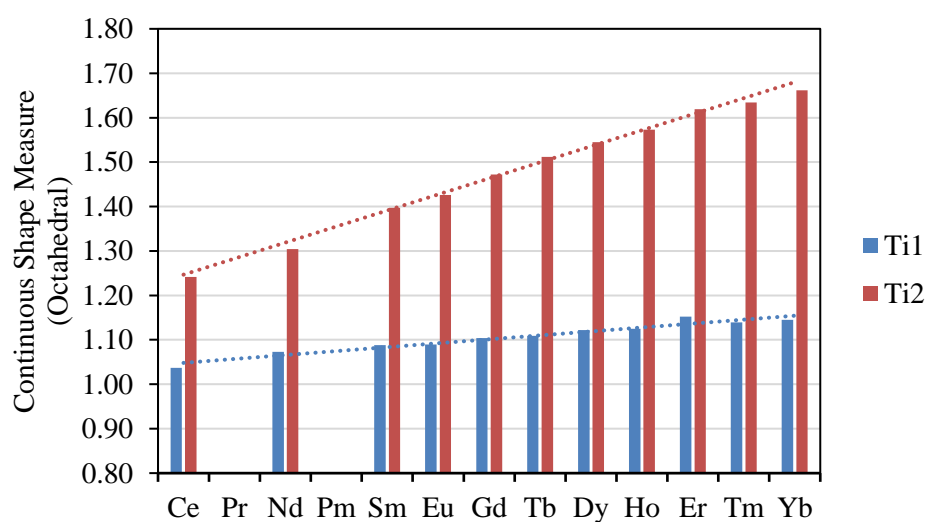

**Figure S5** Graphical representation of the CShM obtained for the series of  $\text{Ti}_4\text{Ln}_2$  cages for the Ti1 and Ti2 octahedron (Figure S3). The Ti2 octahedron is found to be significantly more distorted than the Ti1 octahedron. The steeper gradient across the series for the Ti2 octahedron indicates a larger influence of  $\text{Ln}^{3+}$  on the distortion compared to the Ti1 octahedron. No crystallographic data are available for  $\text{Ln} = \text{Pr}$  and  $\text{Pm}$ .

**Table S4** Ln-Cl and Ln-O bond lengths for the novel  $Ti_4Ln_2$  cages (Ln = Sm, Gd, Tb, Dy, Ho, Er, Tm, Yb) [Å].

|                     | $Ti_4Sm_2$   | $Ti_4Gd_2$   | $Ti_4Tb_2$   | $Ti_4Dy_2$   | $Ti_4Ho_2$   | $Ti_4Er_2$   | $Ti_4Tm_2$   | $Ti_4Yb_2$   |
|---------------------|--------------|--------------|--------------|--------------|--------------|--------------|--------------|--------------|
| Ln—Cl1              | 2.6927(6)    | 2.6721(5)    | 2.6529(5)    | 2.6423(6)    | 2.6324(5)    | 2.6225(18)   | 2.6120(6)    | 2.6011(8)    |
| Ln—O1               | 2.4599(17)   | 2.4436(14)   | 2.4299(15)   | 2.4226(16)   | 2.4109(13)   | 2.403(5)     | 2.3951(16)   | 2.384(2)     |
| Ln—O3               | 2.4614(16)   | 2.4391(14)   | 2.4265(15)   | 2.4162(17)   | 2.4037(12)   | 2.386(5)     | 2.3859(16)   | 2.382(2)     |
| Ln—O4               | 2.5778(17)   | 2.5559(14)   | 2.5448(15)   | 2.5378(17)   | 2.5279(12)   | 2.518(5)     | 2.5114(16)   | 2.515(2)     |
| Ln—O8 <sup>a</sup>  | 2.4772(17)   | 2.4501(15)   | 2.4377(15)   | 2.4256(18)   | 2.4109(13)   | 2.386(6)     | 2.3894(16)   | 2.380(2)     |
| Ln—O9               | 2.4464(18)   | 2.4226(15)   | 2.4056(15)   | 2.3939(16)   | 2.3822(13)   | 2.360(5)     | 2.3581(16)   | 2.340(2)     |
| Ln—O10              | 2.3887(15)   | 2.3656(13)   | 2.3489(13)   | 2.3348(15)   | 2.3233(12)   | 2.312(5)     | 2.2976(14)   | 2.2871(19)   |
| Ln—O10 <sup>a</sup> | 2.3758(16)   | 2.3598(13)   | 2.3401(14)   | 2.3302(15)   | 2.3187(12)   | 2.316(5)     | 2.3002(15)   | 2.287(2)     |
| <b>(Ln—O)ave</b>    | <b>2.455</b> | <b>2.434</b> | <b>2.419</b> | <b>2.409</b> | <b>2.397</b> | <b>2.383</b> | <b>2.377</b> | <b>2.368</b> |

Symmetry code: a = 1-x, 1-y, 1-z

**Table S5** Ln-Cl and Ln-O bond lengths for previously published  $Ti_4Ln_2$  cages (Ln = Ce, Nd, Eu) [Å].

|                  | $Ti_4Ce_2$<br>ZIWYEM | $Ti_4Nd_2$<br>DEJRIV | $Ti_4Eu_2$<br>CURJEG |
|------------------|----------------------|----------------------|----------------------|
| Ln—Cl1           | 2.756                | 2.723                | 2.684                |
| Ln—O1            | 2.522                | 2.485                | 2.456                |
| Ln—O3            | 2.523                | 2.488                | 2.454                |
| Ln—O4            | 2.653                | 2.605                | 2.575                |
| Ln—O8            | 2.529                | 2.501                | 2.466                |
| Ln—O9            | 2.521                | 2.481                | 2.439                |
| Ln—O10           | 2.459                | 2.405                | 2.369                |
| Ln—O10           | 2.438                | 2.422                | 2.378                |
| <b>(Ln—O)ave</b> | <b>2.521</b>         | <b>2.484</b>         | <b>2.461</b>         |

**Table S6** Ln-Cl and Ln-O bond lengths for previously published  $Ti_8Ln$  cages (Ln = Ce, Er) [Å].

|                  | $Ti_8Ce$<br>ZIWYAI | $Ti_8Er$<br>ORIFAY |
|------------------|--------------------|--------------------|
| Ln—O             | 2.418              | 2.305              |
| Ln—O             | 2.420              | 2.345              |
| Ln—O             | 2.518              | 2.364              |
| Ln—O             | 2.563              | 2.339              |
| Ln—O             | 2.418              | 2.312              |
| Ln—O             | 2.420              | 2.352              |
| Ln—O             | 2.518              | 2.356              |
| Ln—O             | 2.563              | 2.345              |
| Ln—O(ethanol)    | 2.069              | —                  |
| <b>(Ln—O)ave</b> | <b>2.436</b>       | <b>2.340</b>       |

**Table S7** Continuous Shape Measure (CShM) for  $Ti_8Ln$  cages.

| $Ti_8Ce$ (ZIWYAI) |       | $Ti_8Er$ (ORIFAY) |       |                                 |
|-------------------|-------|-------------------|-------|---------------------------------|
| Ti1               | 1.200 | Ti1               | 1.219 | [Part of face-sharing pair]     |
| Ti2               | 1.108 | Ti2               | 1.185 | [Part of face-sharing pair]     |
| Ti2A              | 1.108 | Ti3               | 1.152 | [Part of face-sharing pair]     |
| Ti1A              | 1.200 | Ti4               | 1.201 | [Part of face-sharing pair]     |
| Ti3A              | 0.843 | Ti5               | 0.817 | [Part of edge-sharing TiO core] |
| Ti3               | 0.843 | Ti6               | 0.830 | [Part of edge-sharing TiO core] |
| Ti4               | 1.694 | Ti7               | 1.635 | [Part of edge-sharing TiO core] |
| Ti4A              | 1.694 | Ti8               | 1.630 | [Part of edge-sharing TiO core] |

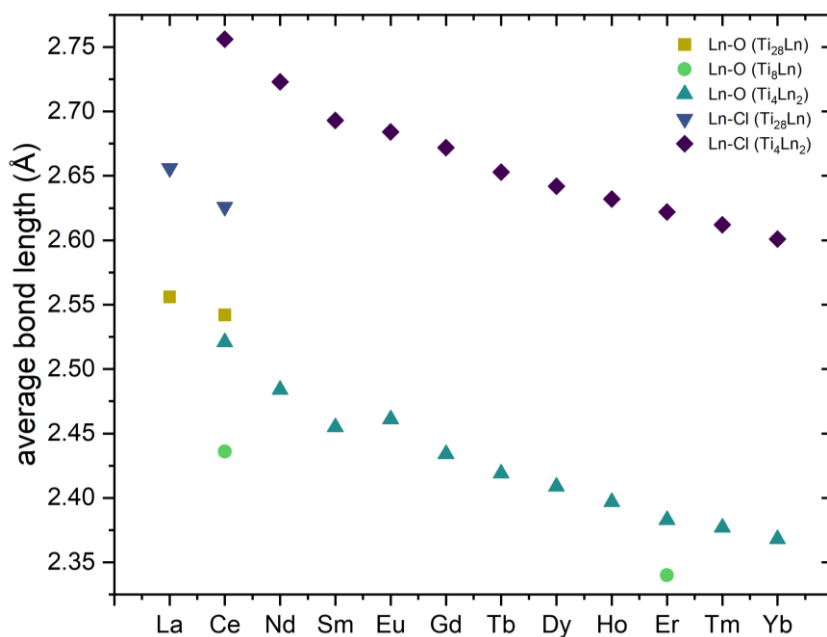

**Figure S6** Comparison of the average Ln-O and Ln-Cl bond lengths in  $\text{Ti}_{28}\text{Ln}$ ,  $\text{Ti}_8\text{Ln}$  and  $\text{Ti}_4\text{Ln}_2$  cages based on the structural data in Tables S4-S6. A decreasing trend is observed along the series of lanthanides, which is in agreement with the decreasing ionic radius of  $\text{Ln}^{3+}$  and the resulting increase in Lewis acidity.

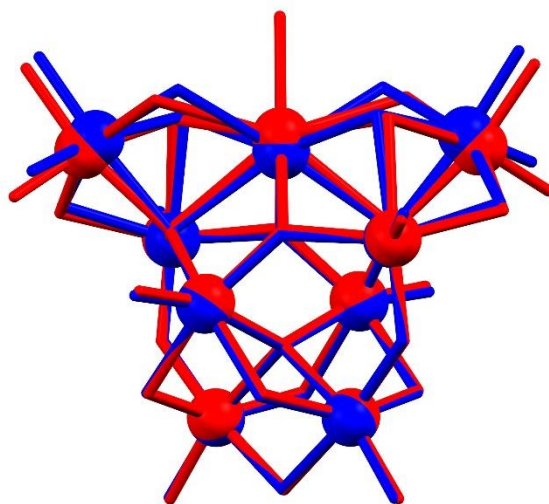

**Figure S7** Structural overlay of the two  $\text{Ti}_8\text{Ln}$  cages (Ln = Ce [red] and Er [blue]). The geometry of the lower section of the complexes (comprising edge-sharing octahedra) is essentially identical. The upper  $\text{TiO}_6$  octahedra show some flexibility in the  $\text{Ln}^{3+}$  binding site: For  $\text{Ti}_8\text{Ce}$  the octahedra are tilted away from  $\text{Ce}^{3+}$ , and the additional EtOH molecule is coordinated above the binding site. For  $\text{Ti}_8\text{Er}$  the octahedra are tilted further towards  $\text{Er}^{3+}$  and there is no additional coordination.



## Magnetic measurements

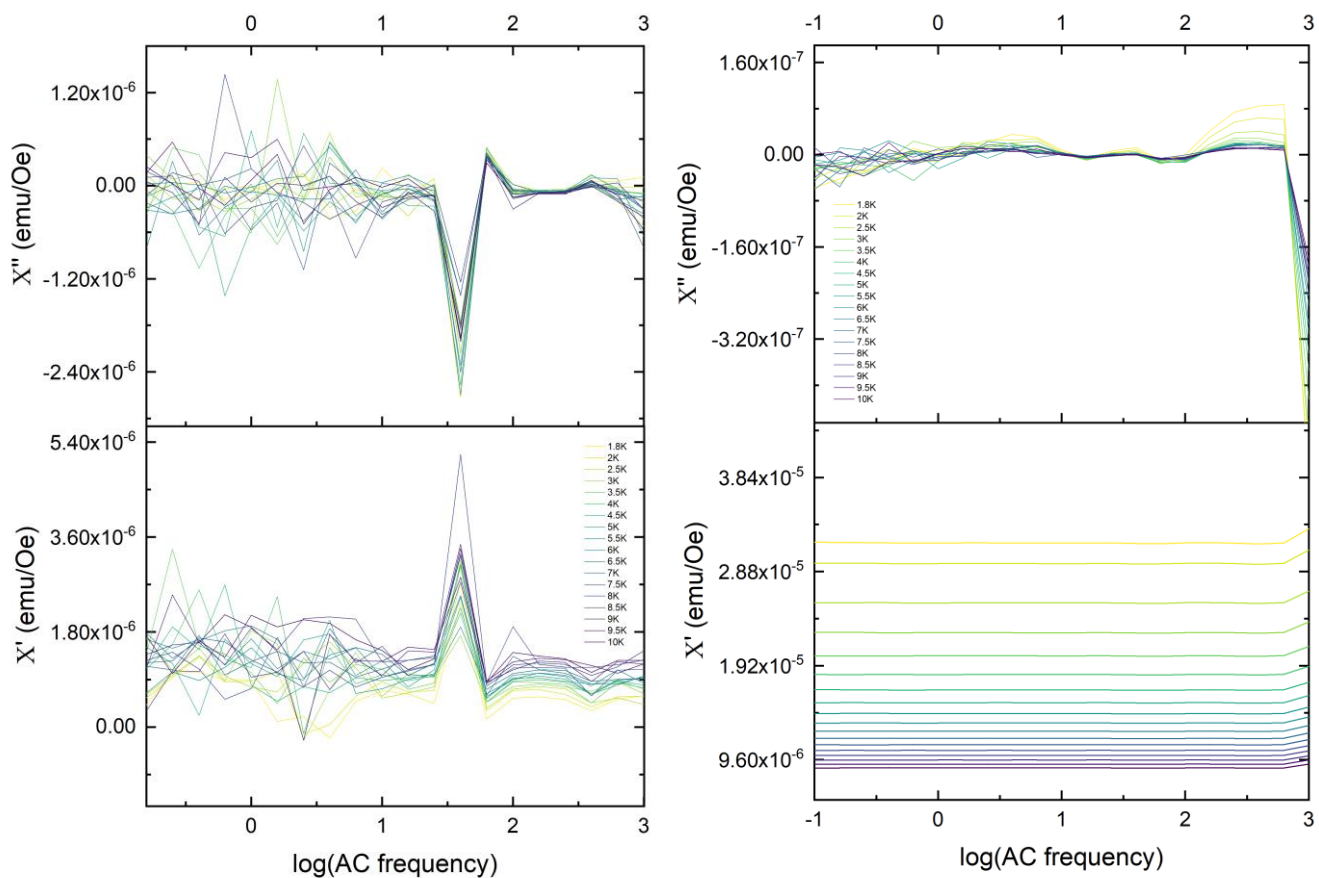

**Figure S8** AC susceptibility measurements at various temperatures between 0.1 and 1000 Hz of  $\text{Dy}_2\text{Ti}_4$  (left) and  $\text{Ho}_2\text{Ti}_4$  (right). Some temperature independent features are observed in the Dy sample at around 60 Hz, which might result from sample movement during the measurement and can't be assigned to a relaxation response. No features are seen in case of Ho.

## Decomposition studies

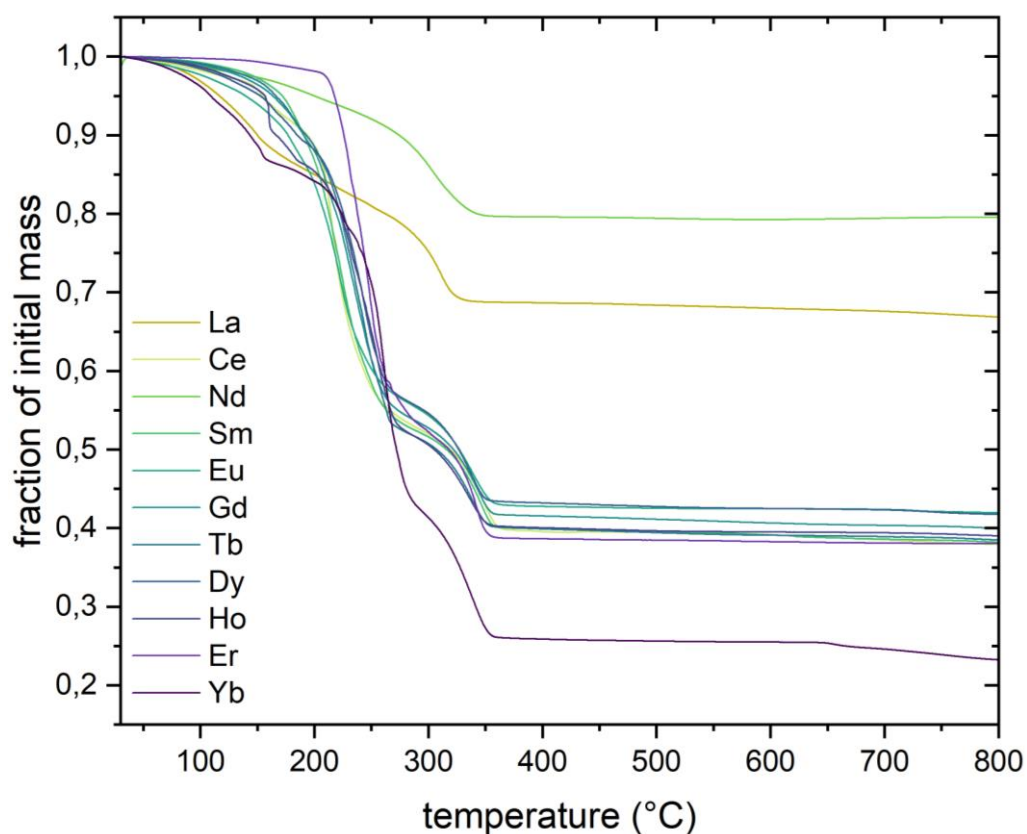

**Figure S9** TGA curves for all Ln-POTs synthesised in this work. The measurements were carried out under nitrogen between 30-800°C. Distinct curves are observed for lanthanum ( $\text{Ti}_2\text{La}$ ), neodymium ( $\text{Ti}_4\text{Nd}_2$ ) and erbium ( $\text{Ti}_8\text{Er}$ ). The remaining lanthanides ( $\text{Ti}_4\text{Ln}_2$ ) show similar thermal decomposition steps.

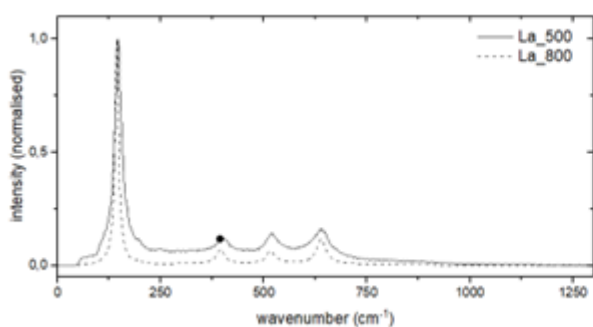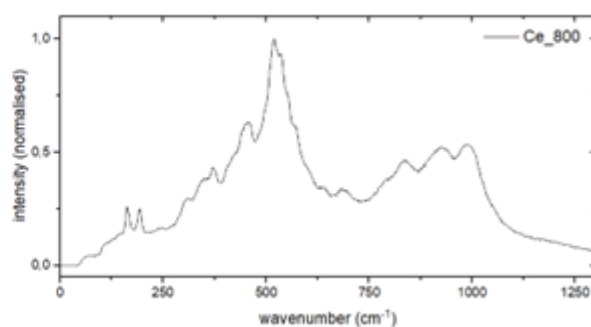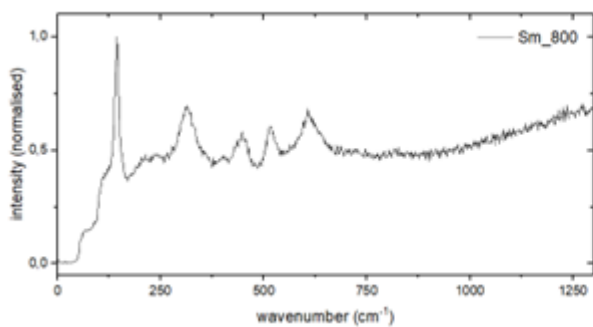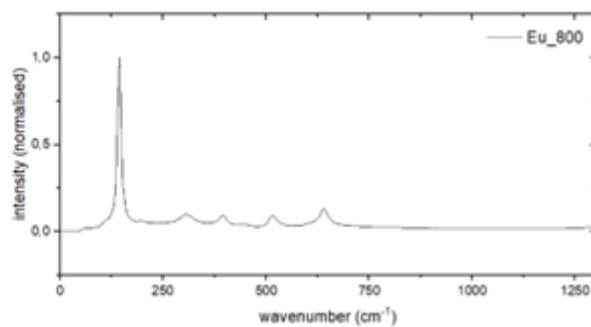

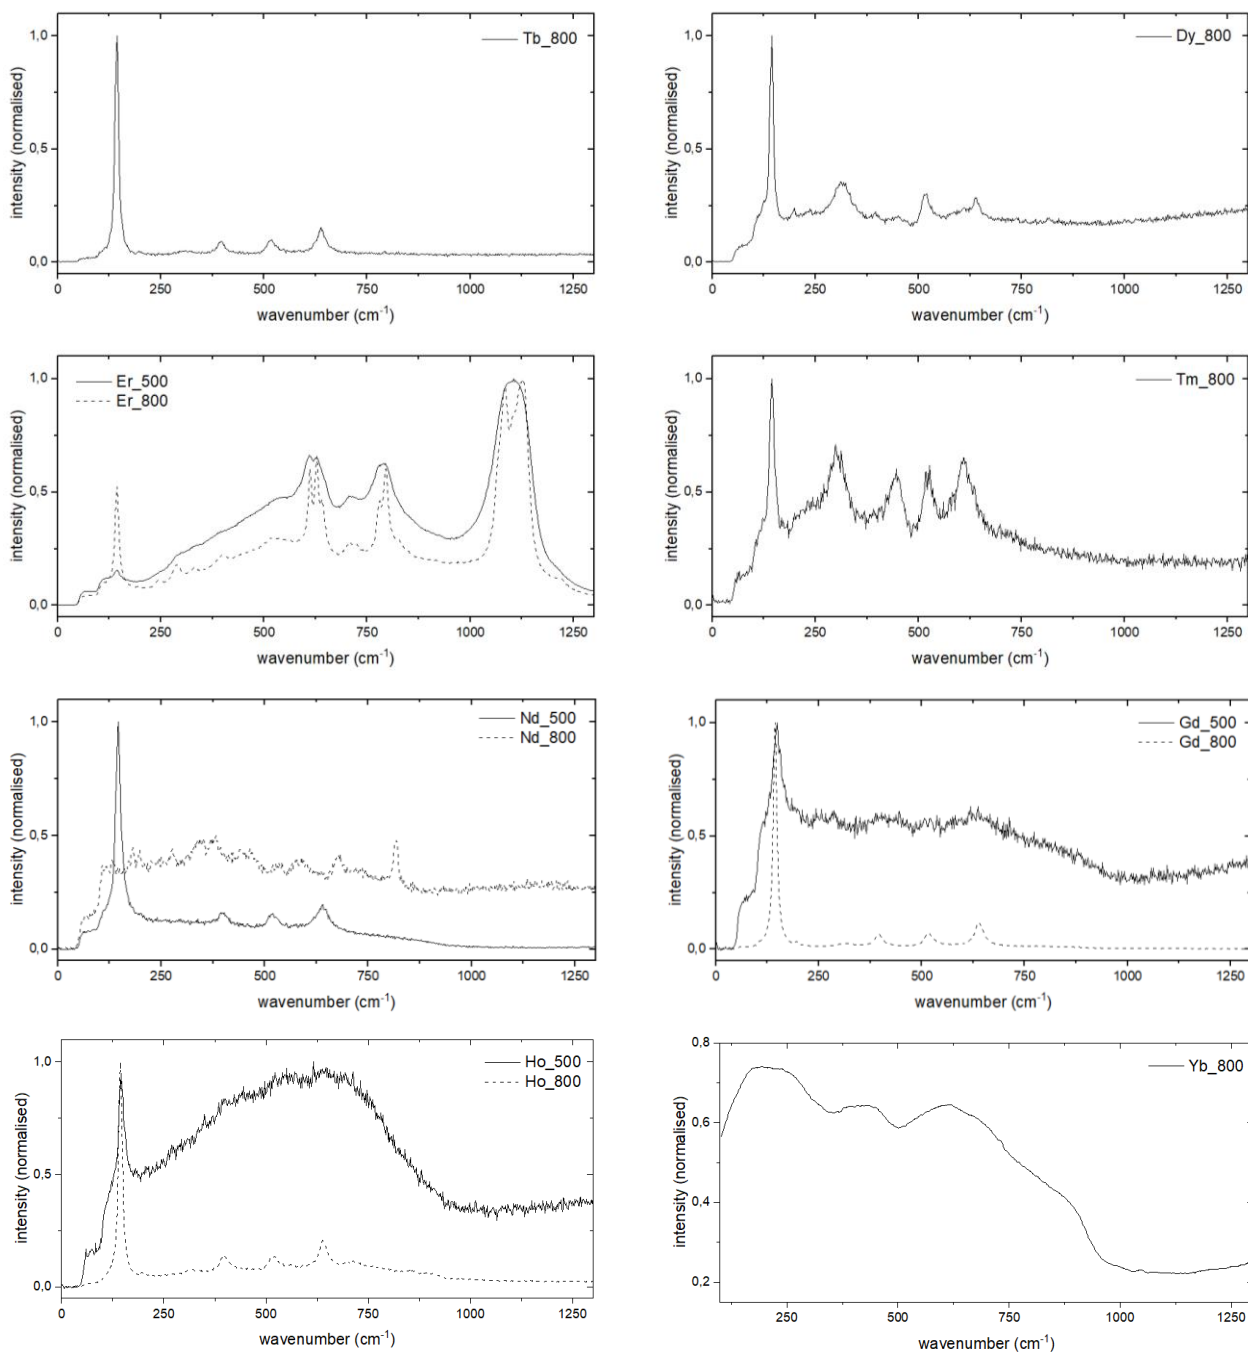

**Figure S10** Raman spectra of all Ln-TiO<sub>2</sub> samples obtained from hydrolytic decomposition and annealing at 500 and 800°C. The spectra of 500°C-samples show poor crystallinity and were excluded where no significant peaks were visible. However, for Ln = La, Nd, Gd, Ho and Er the formation of the main component anatase (144, 197, 399, 516, 639 cm<sup>-1</sup>) can be observed even at lower temperatures. Additional peaks account for the formation of Ln<sub>4</sub>Ti<sub>9</sub>O<sub>24</sub> (Ln = Nd) or Ln<sub>2</sub>Ti<sub>2</sub>O<sub>7</sub>.

## SEM measurements

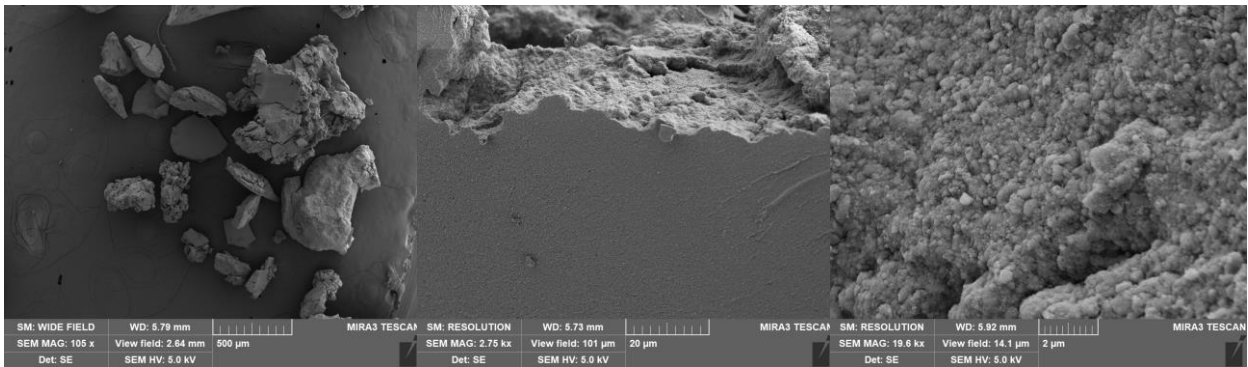

**Figure S11** Crystalline particles of Sm-TiO<sub>2</sub> after annealing to 800°C under air. Viewing fields are chosen to be 2.5 mm, 100 μm and 15 μm (left to right).

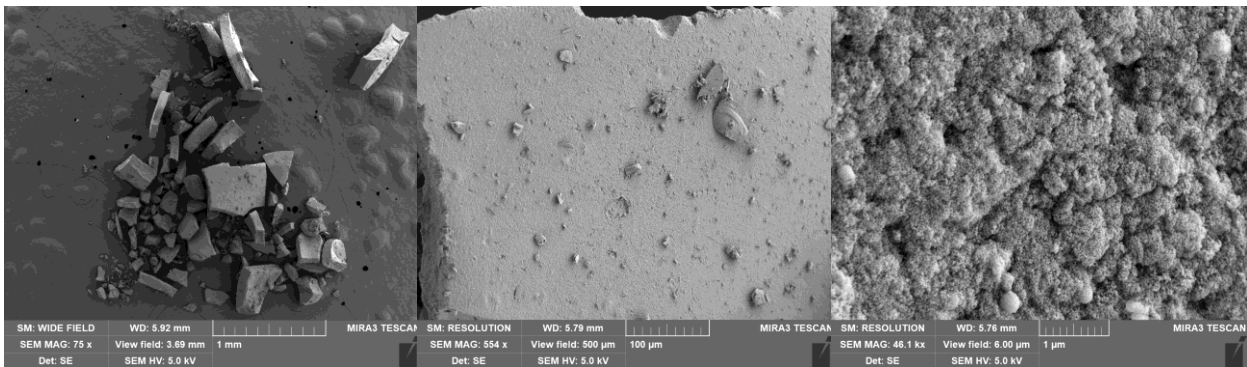

**Figure S12** Crystalline particles of Gd-TiO<sub>2</sub> after annealing to 800°C under air. Viewing fields are chosen to be 3.7 mm, 500 μm and 6 μm (left to right).

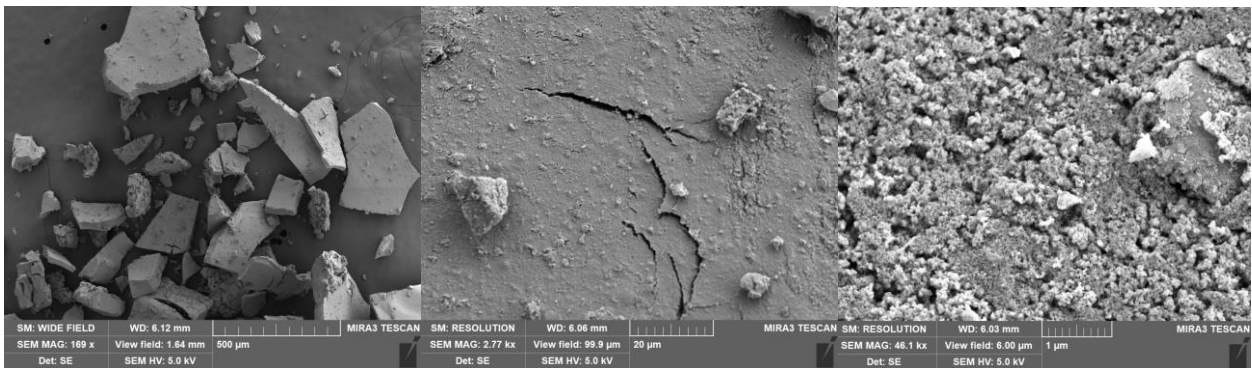

**Figure S13** Crystalline particles of Tb-TiO<sub>2</sub> after annealing to 800°C under air. Viewing fields are chosen to be 1.6 mm, 100 μm and 6 μm (left to right).

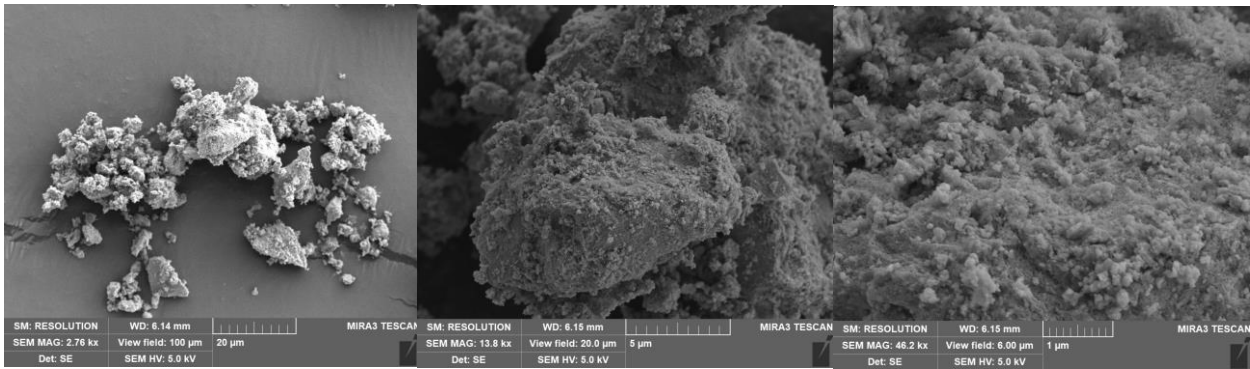

**Figure S14** Crystalline particles of Dy-TiO<sub>2</sub> after annealing to 800°C under air. Viewing fields are chosen to be 100 μm, 60 μm and 6 μm (left to right).

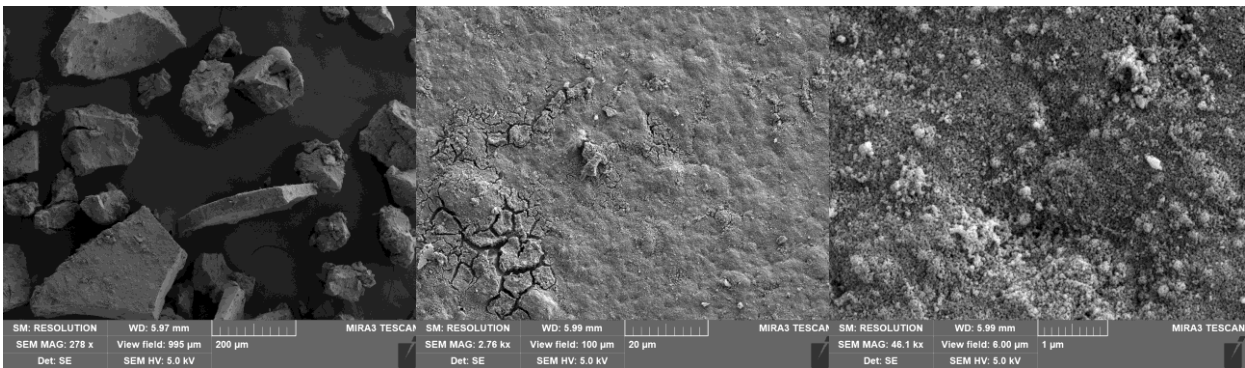

**Figure S15** Crystalline particles of Ho-TiO<sub>2</sub> after annealing to 800°C under air. Viewing fields are chosen to be 200 μm, 20 μm and 6 μm (left to right).

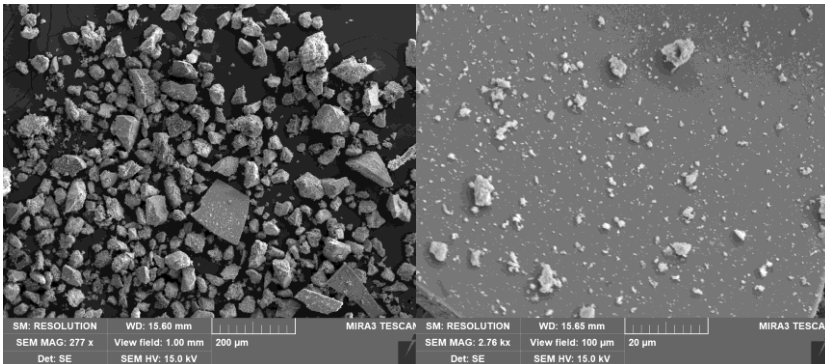

**Figure S16** Crystalline particles of Tm-TiO<sub>2</sub> after annealing to 800°C under air. Viewing fields are chosen to be 200 μm and 20 μm (left to right).

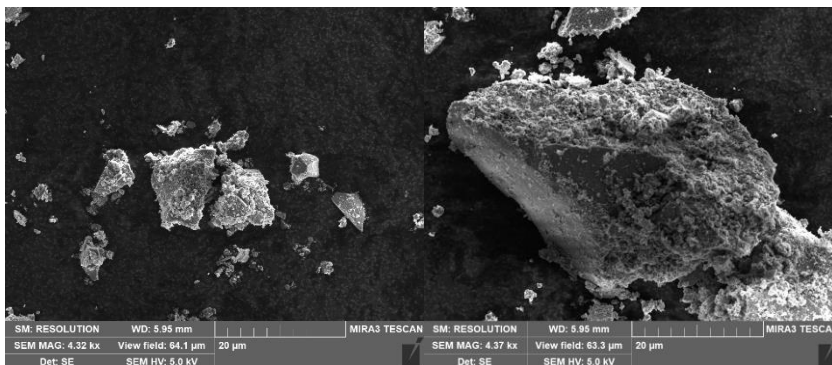

**Figure S17** Crystalline particles of Yb-TiO<sub>2</sub> after annealing to 800°C under air. Viewing fields are chosen to be 60 μm.



# EDX measurements

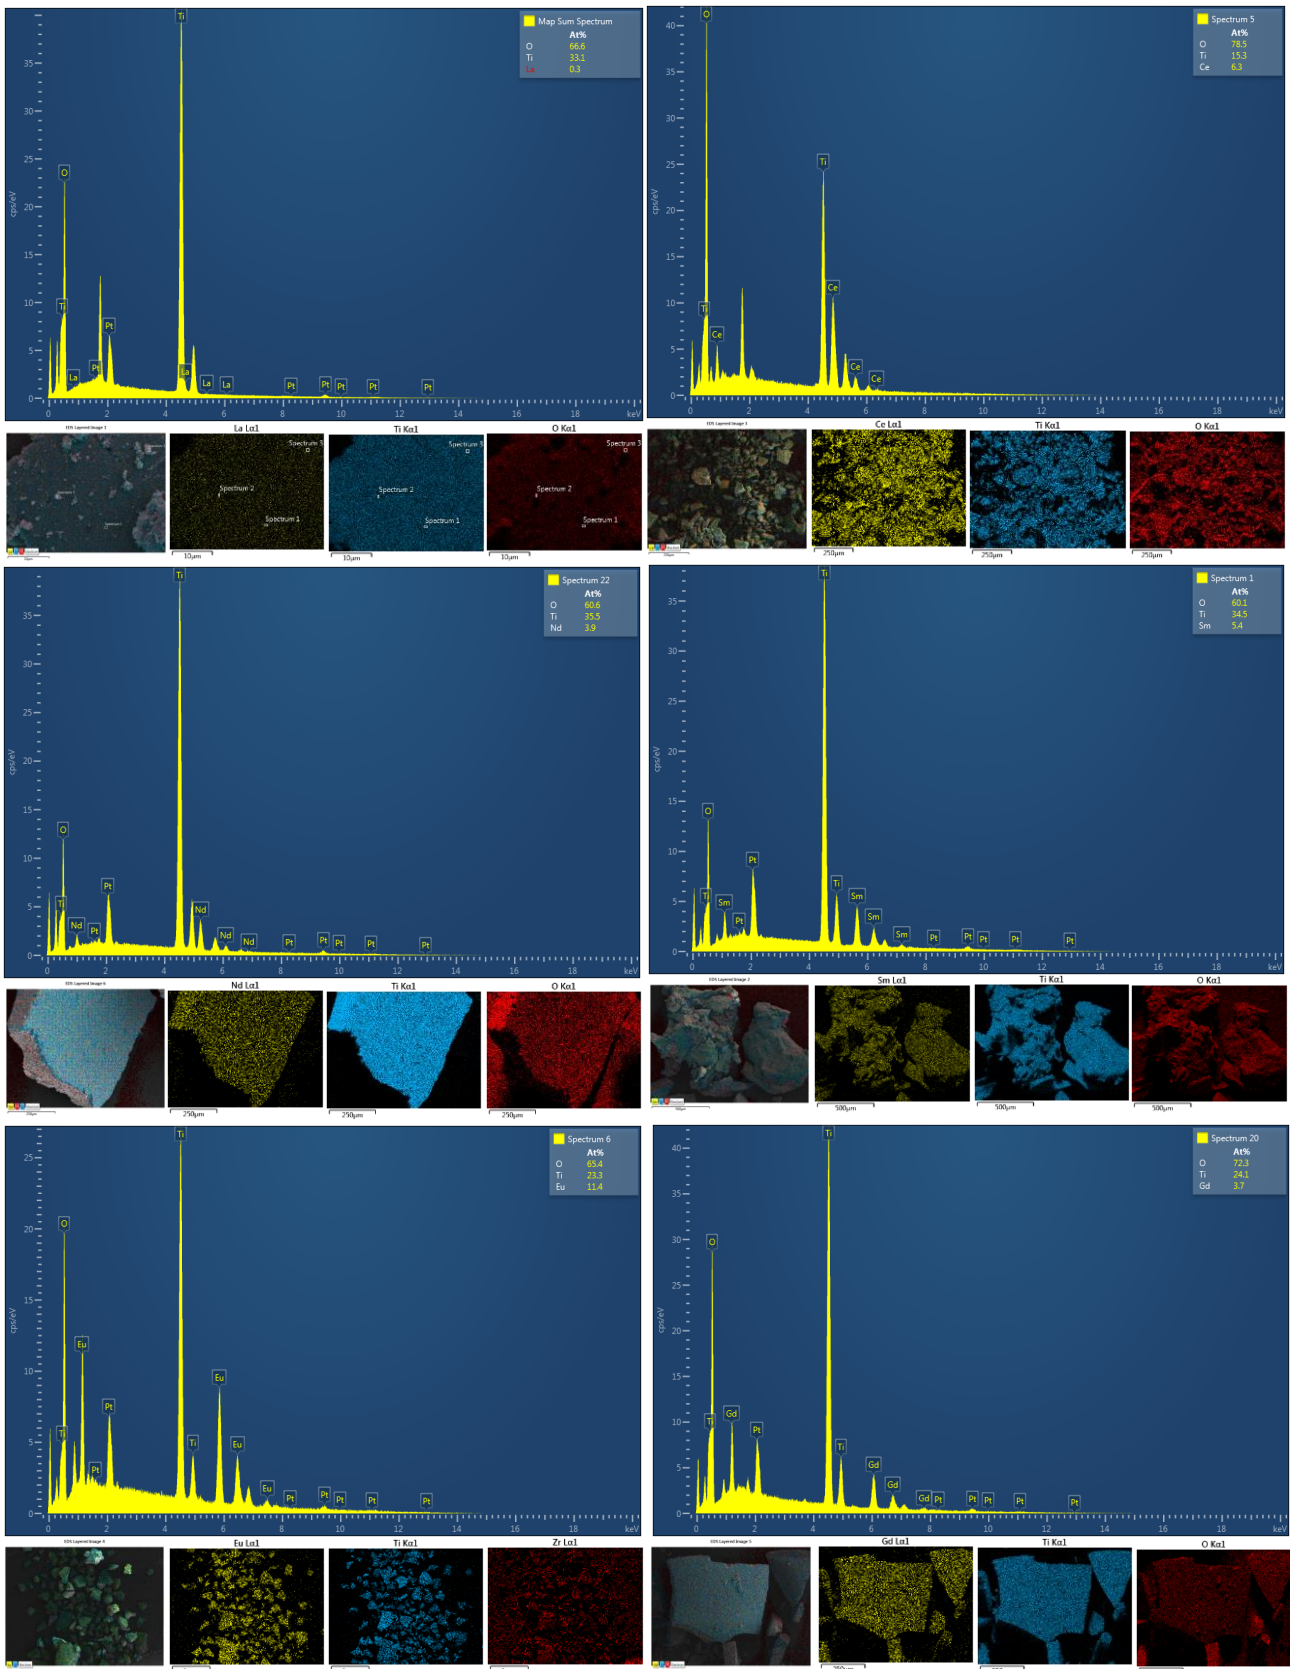

**Figure S18** Map EDX spectra (at%) and elemental distribution of the decomposed Ln-TiO<sub>2</sub> samples for Ln = La, Ce, Nd, Sm, Eu and Gd (ltr, ttb). The samples were sputtered with Pt prior to measurements, which explains the Pt peaks (unassigned) in the spectra.

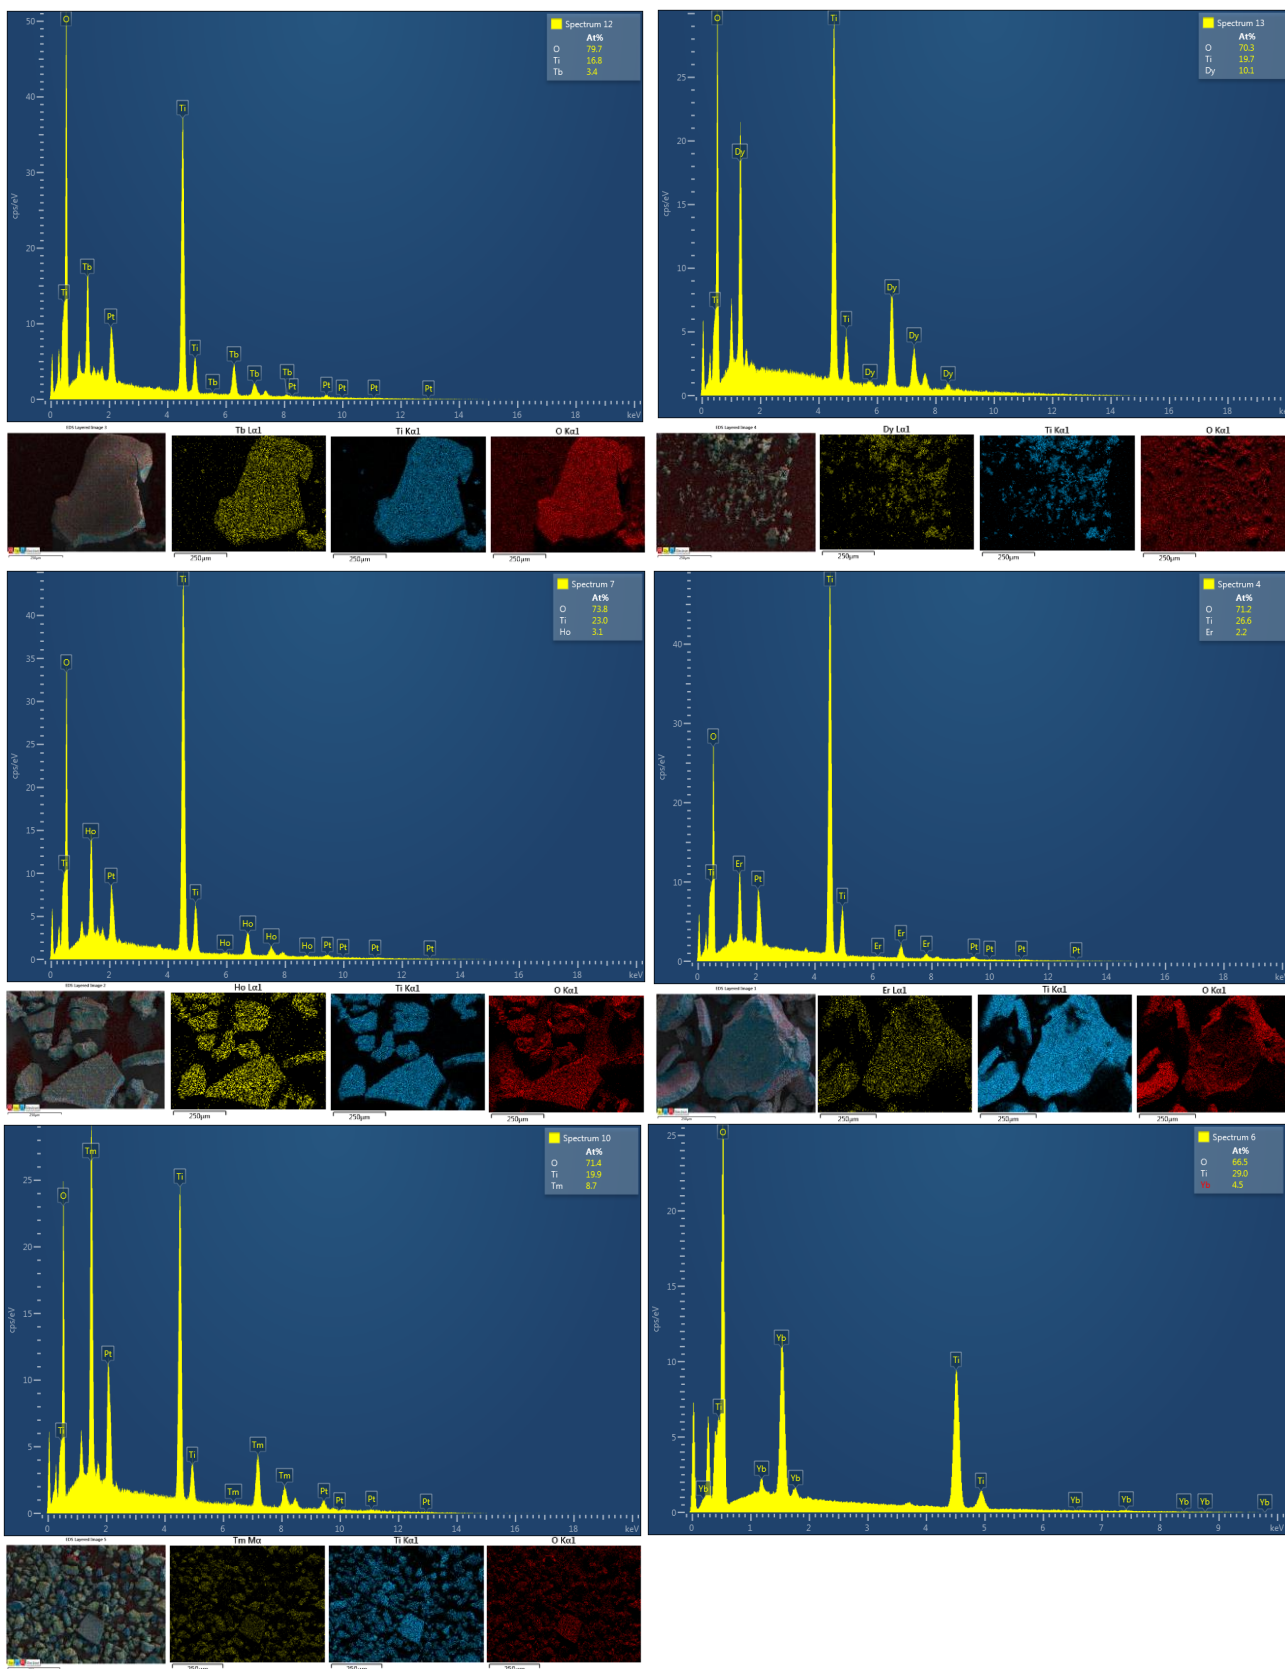

**Figure S19** Map EDX spectra (at%) and elemental distribution of the decomposed Ln-TiO<sub>2</sub> samples for Ln = Tb, Dy, Ho, Er, Tm and Yb (ltr, ttb). The samples were sputtered with Pt prior to measurements, which explains the Pt peaks (unassigned) in the spectra.

# Rietveld refinements

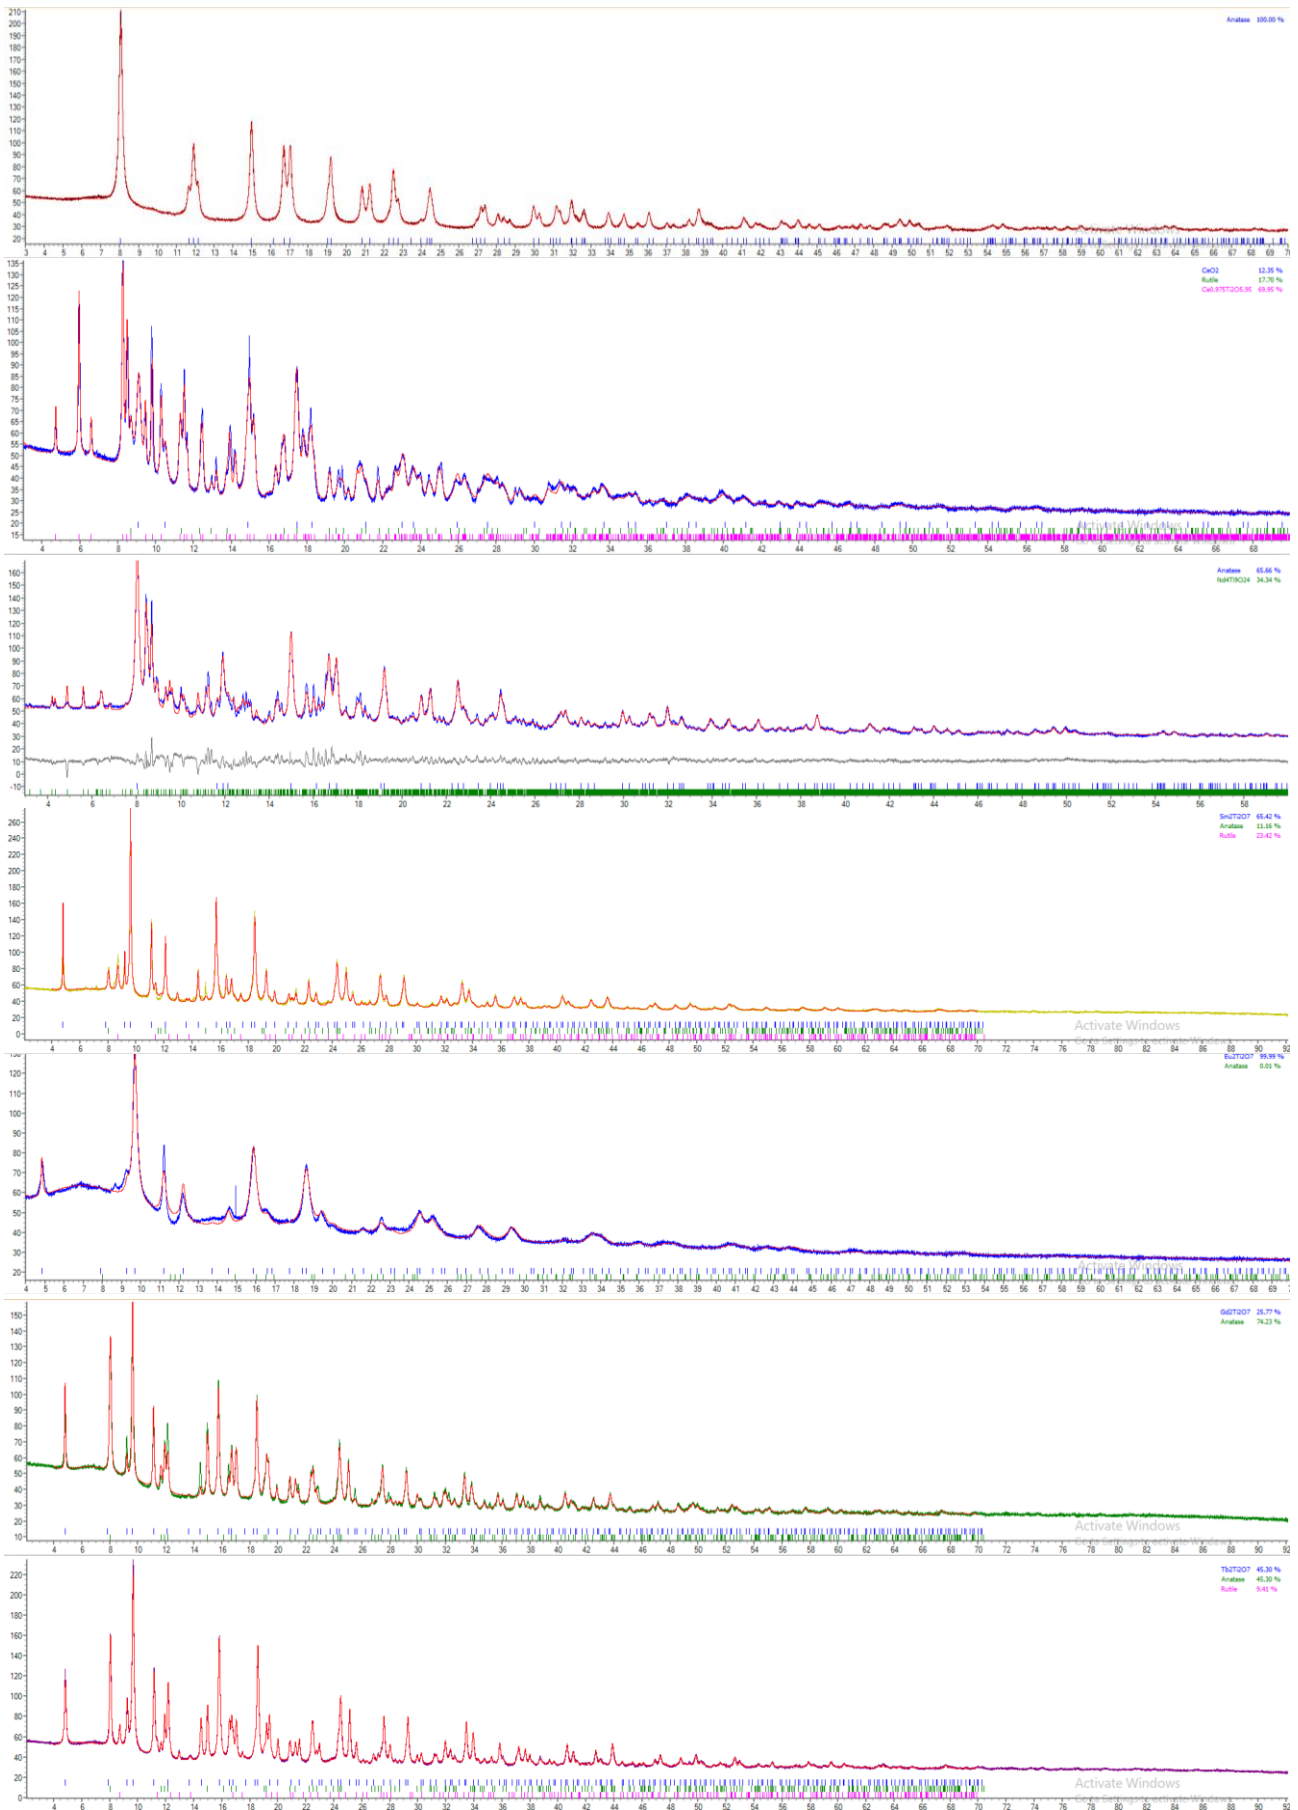



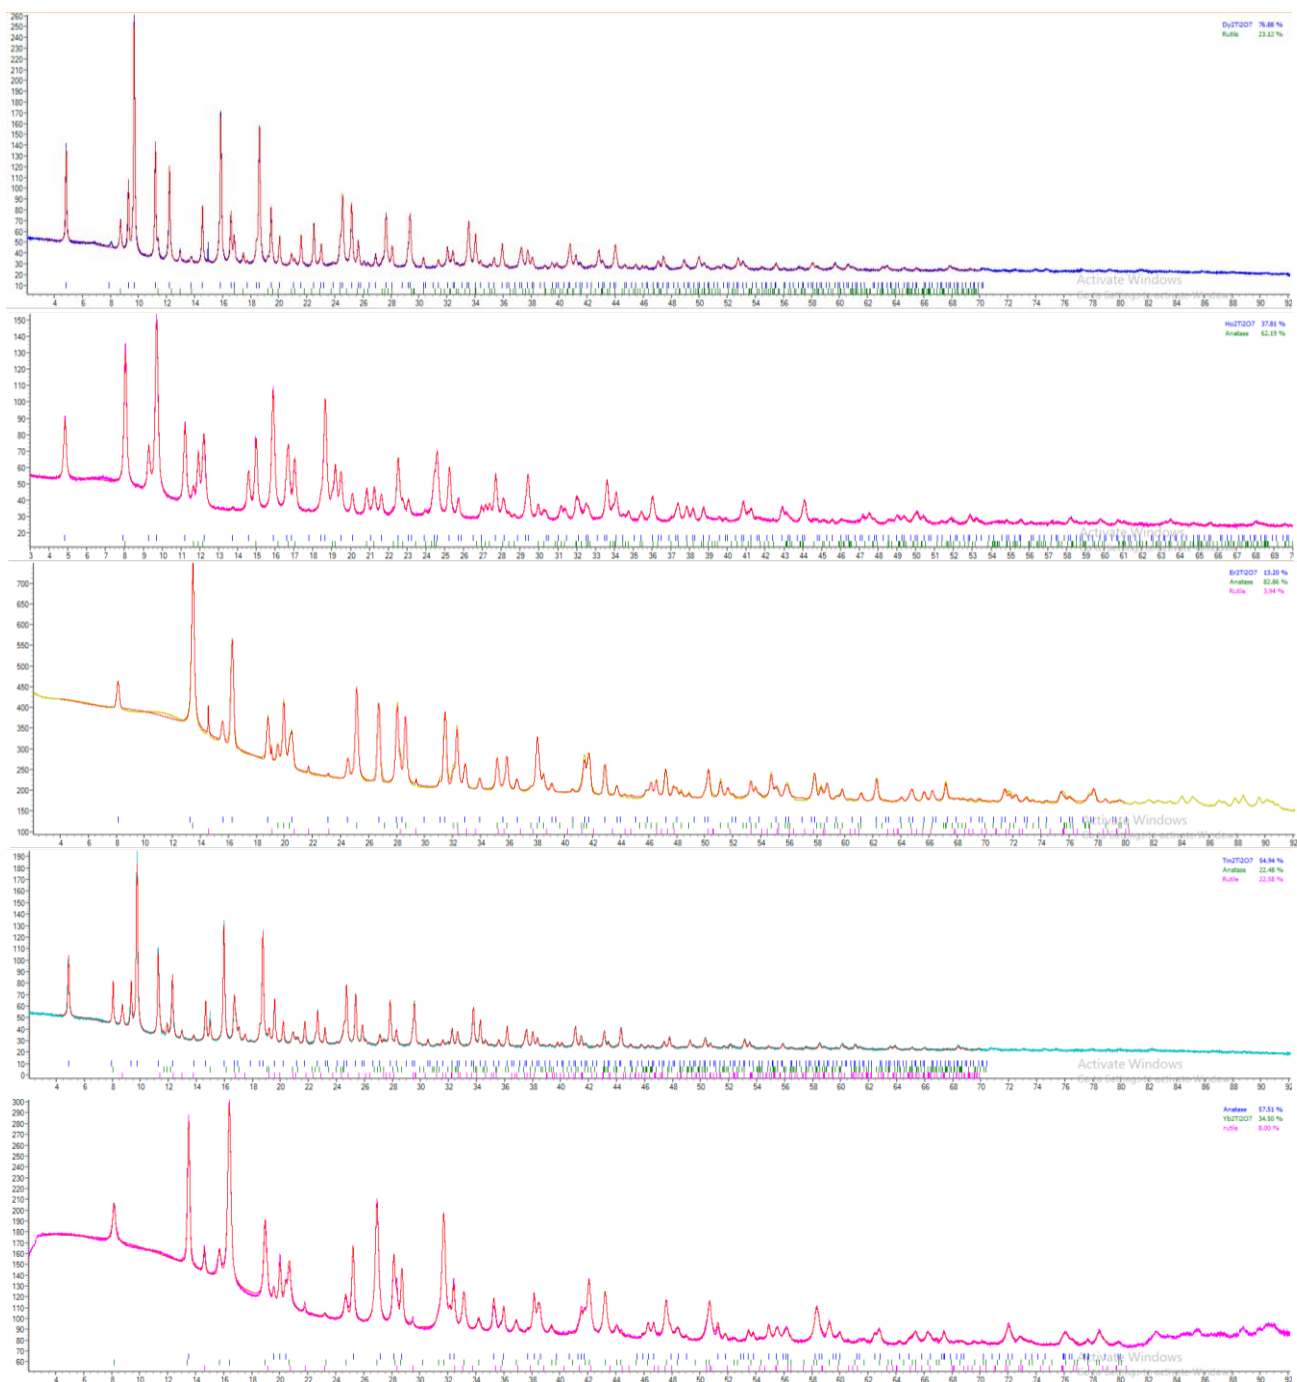

**Figure S20** Measured powder patterns and the fitted curves (red) obtained from Rietveld refinements on Topas Academic for Ln/TiO hybrid materials (from top to bottom; Ln = La, Ce, Nd, Sm, Eu, Gd, Tb, Dy, Ho, Er, Tm, Yb). The peak positions of the single phases are indicated as tick marks below. The data was refined against a silicon standard at  $0.82443 \text{ \AA}$  (Ln=Er) or  $0.49381 \text{ \AA}$ .

| Ln | site mixing                                          | R <sub>wp</sub> | R <sub>exp</sub> | GoF  |
|----|------------------------------------------------------|-----------------|------------------|------|
| La | -                                                    | 4.53            | 2.56             | 1.77 |
| Ce | -                                                    | 9.68            | 2.68             | 3.61 |
| Nd | -                                                    | 7.49            | 2.19             | 4.42 |
| Sm | Sm <sub>1.7</sub> Ti <sub>2.3</sub> O <sub>7</sub>   | 8.41            | 2.33             | 3.60 |
| Eu | Eu <sub>1.5</sub> Ti <sub>2.5</sub> O <sub>7</sub>   | 6.13            | 2.47             | 2.48 |
| Gd | Gd <sub>2.3</sub> Ti <sub>0.7</sub> O <sub>7</sub>   | 8.83            | 2.71             | 3.25 |
| Tb | Tb <sub>2.03</sub> Ti <sub>1.97</sub> O <sub>7</sub> | 5.65            | 2.25             | 2.51 |
| Dy | Dy <sub>1.95</sub> Ti <sub>2.05</sub> O <sub>7</sub> | 5.28            | 2.65             | 1.99 |
| Ho | Ho <sub>1.83</sub> Ti <sub>2.13</sub> O <sub>7</sub> | 4.01            | 2.65             | 1.51 |
| Er | -                                                    | 2.96            | 0.39             | 7.56 |
| Tm | Tm <sub>2.07</sub> Ti <sub>1.93</sub> O <sub>7</sub> | 6.19            | 2.92             | 2.12 |
| Yb | Yb <sub>2.18</sub> Ti <sub>0.82</sub> O <sub>7</sub> | 2.67            | 0.89             | 3.01 |

**Table S8** Selected refinement parameters for Ln-TiO<sub>2</sub>.

# UV-Vis measurements

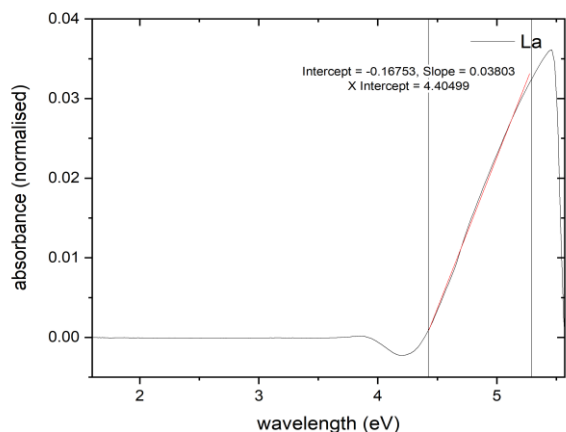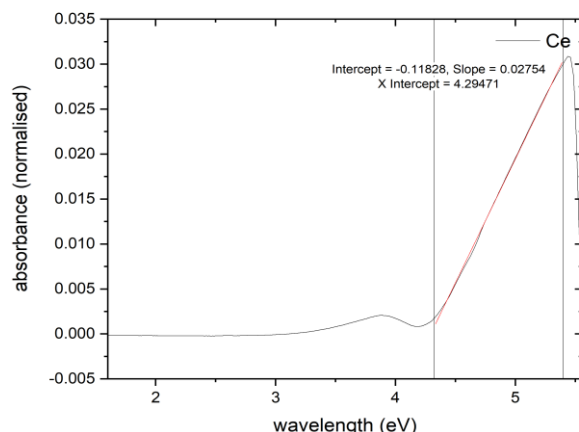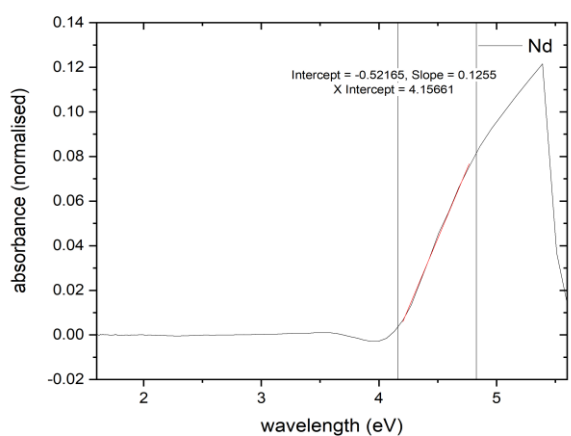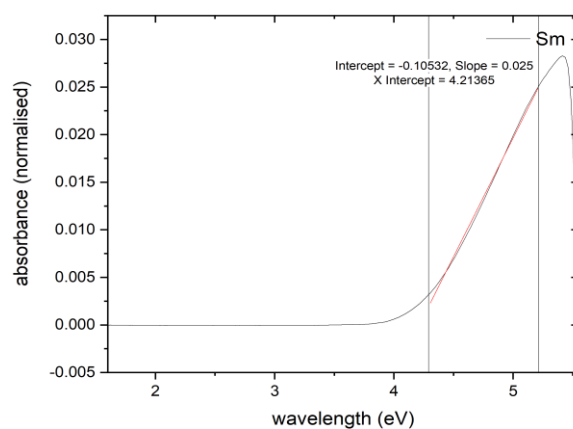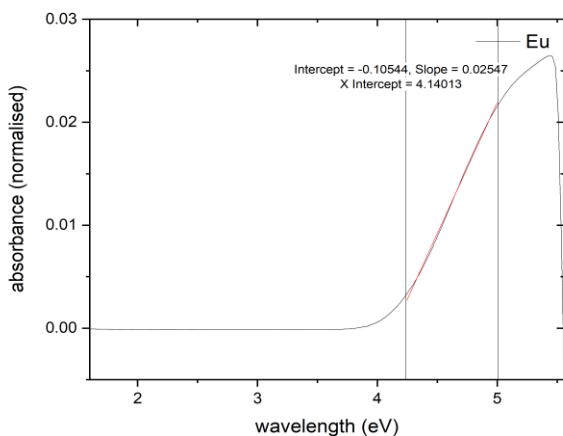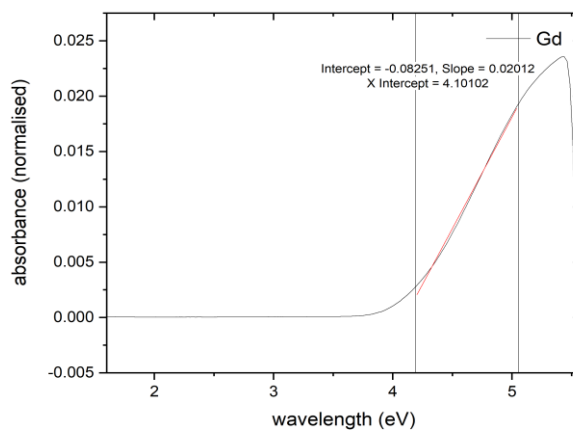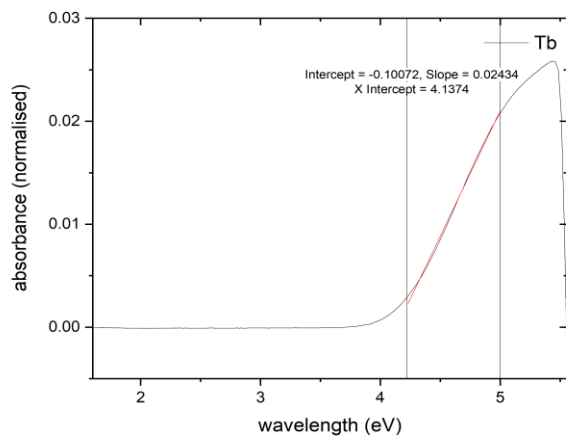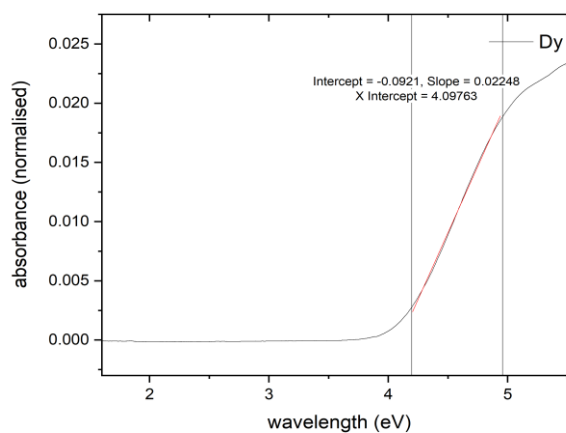

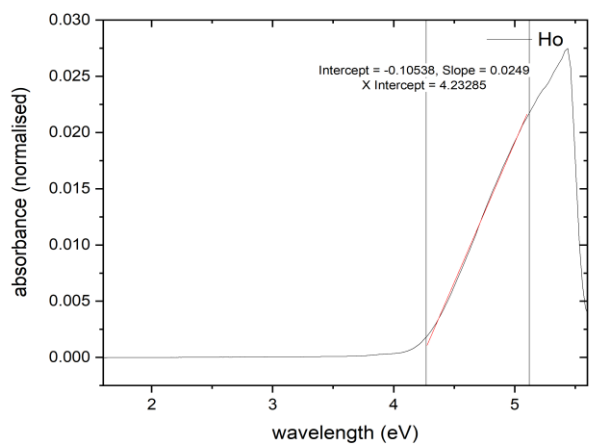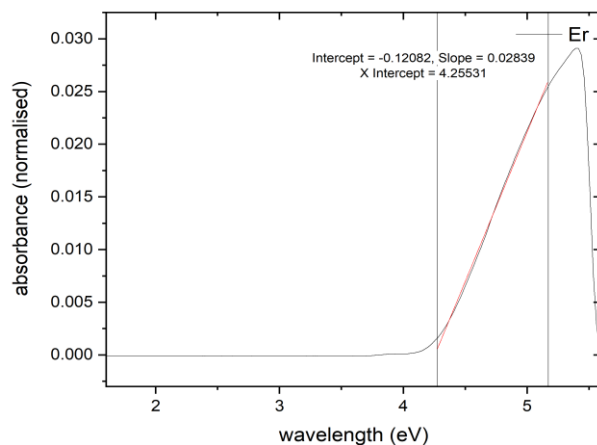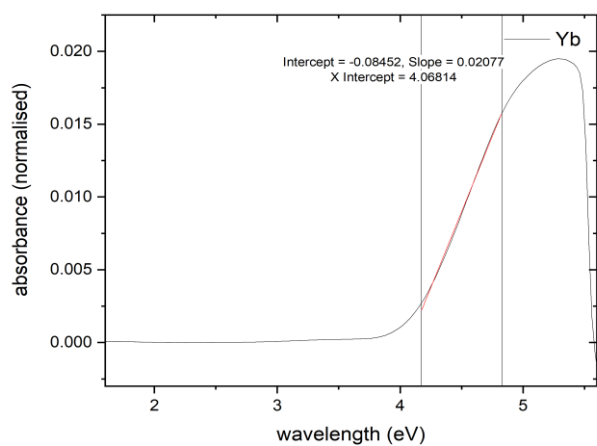

**Figure S21** Solution-state UV-Vis spectra of the Ln-POT compounds (0.033 mg/mL in DCM) and the linear extrapolation of the main absorption peak ( $O(p) \rightarrow Ti(d)$ ) in the  $Ti_xO_y$ -framework). The X intercept is taken as an estimate of the HOMO-LUMO gap of the compounds. Errors are estimated to be around  $\pm 0.1$  eV.

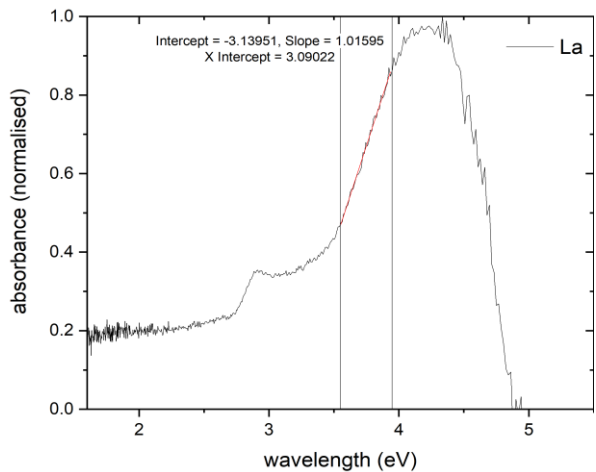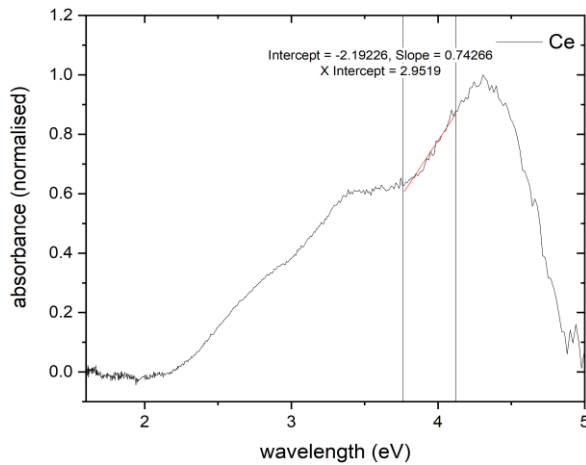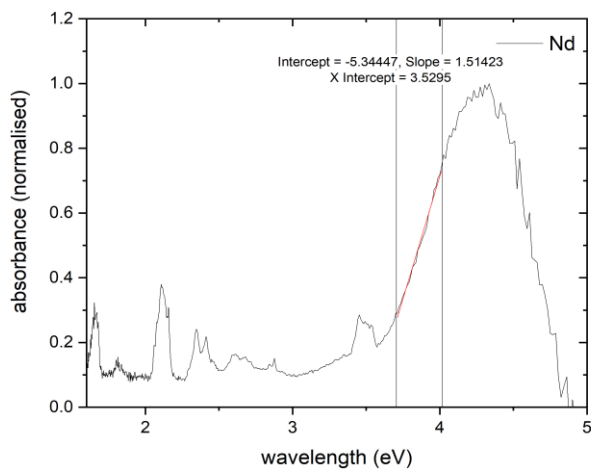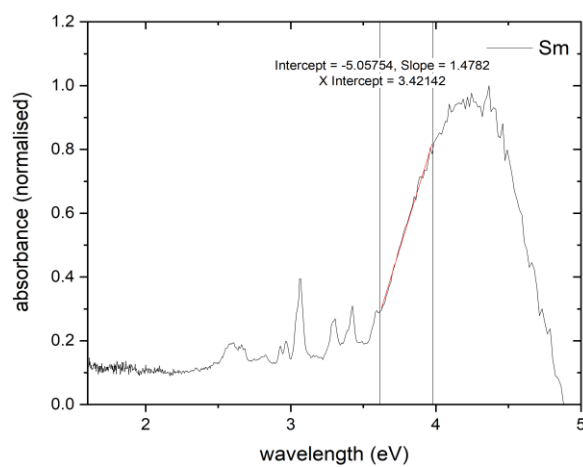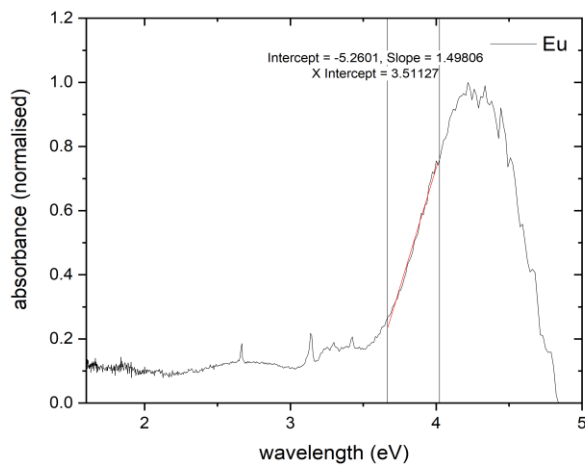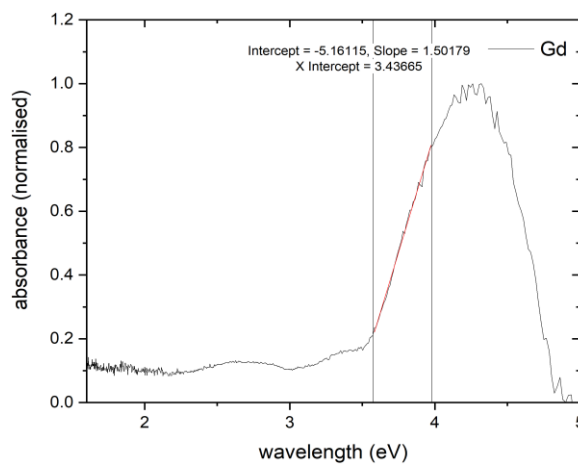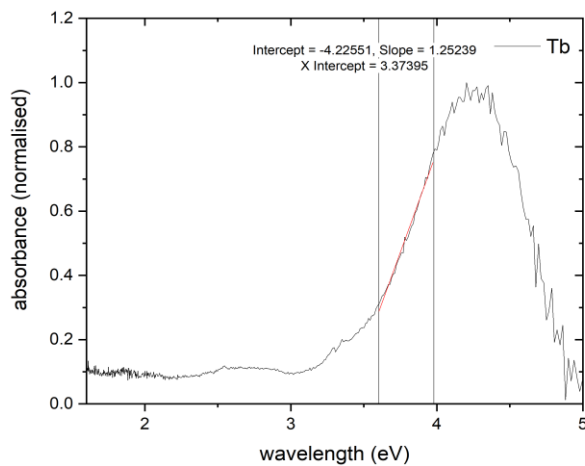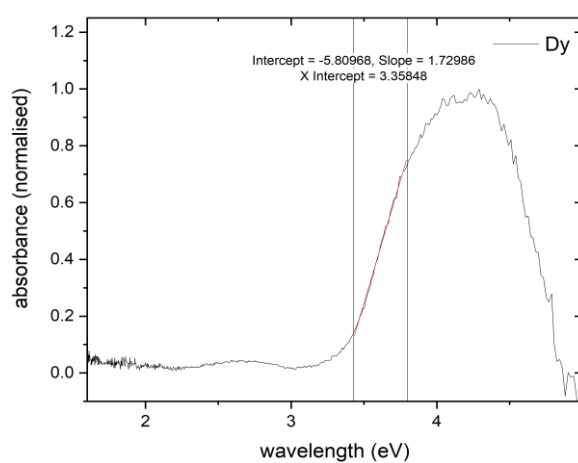

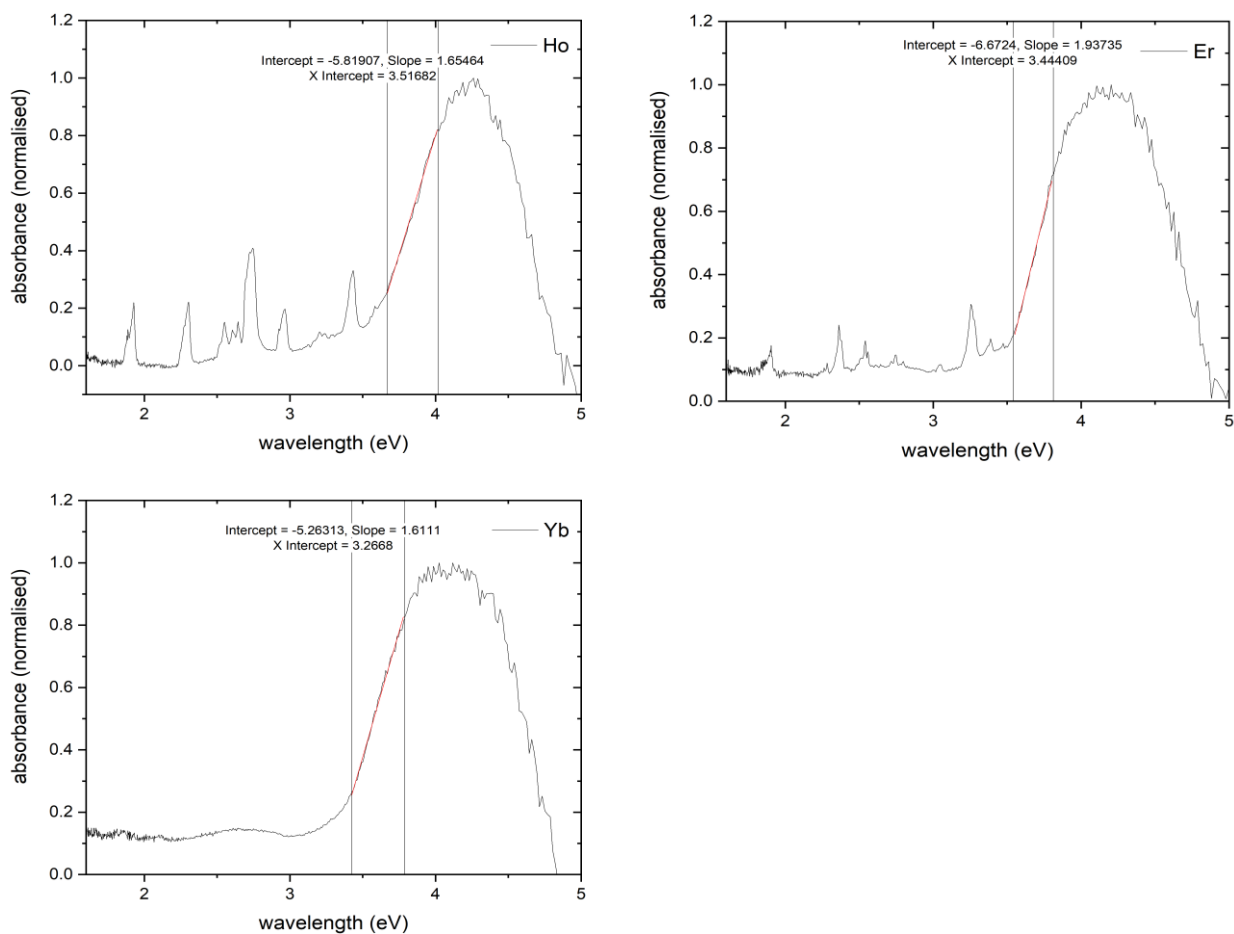

**Figure S22** Solid-state UV-Vis spectra of the Ln-POT compounds and the linear extrapolation of the main absorption peak (O(p)  $\rightarrow$  Ti(d) in the  $Ti_xO_y$ -framework). The X intercept is taken as an estimate of the HOMO-LUMO gap of the compounds. Errors are estimated to be around  $\pm 0.1$  eV.

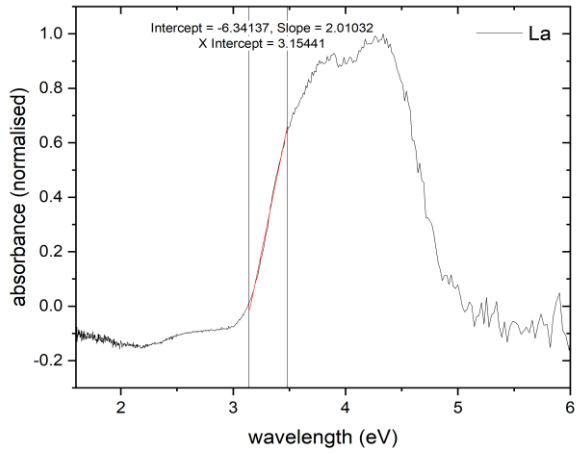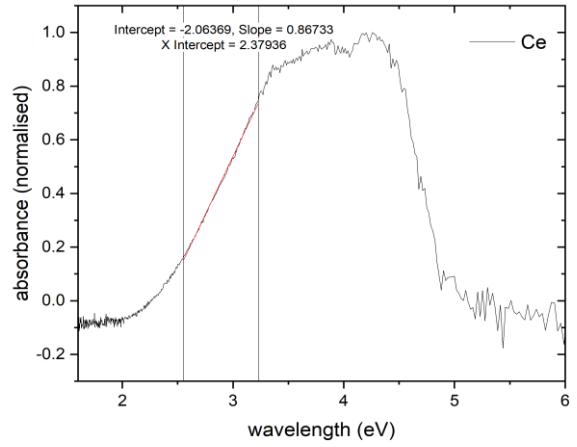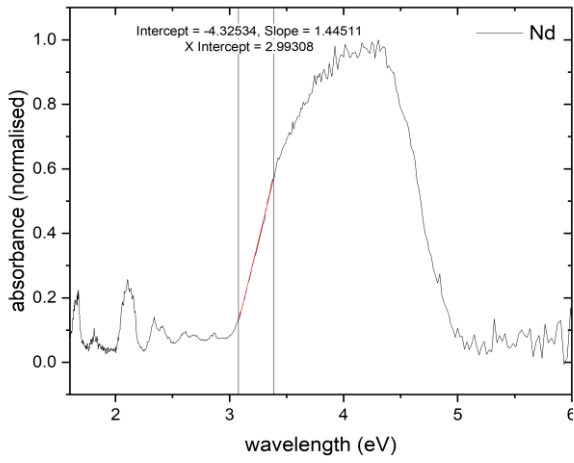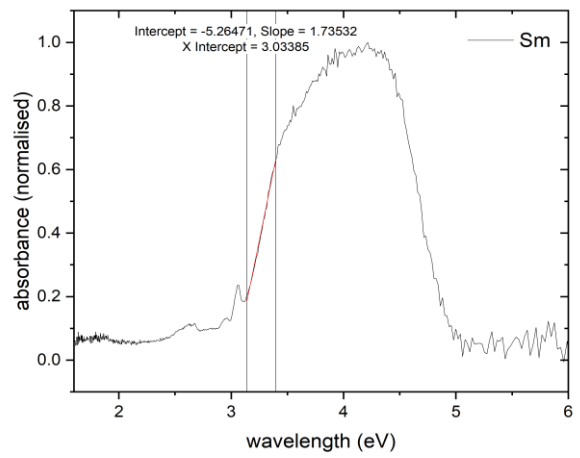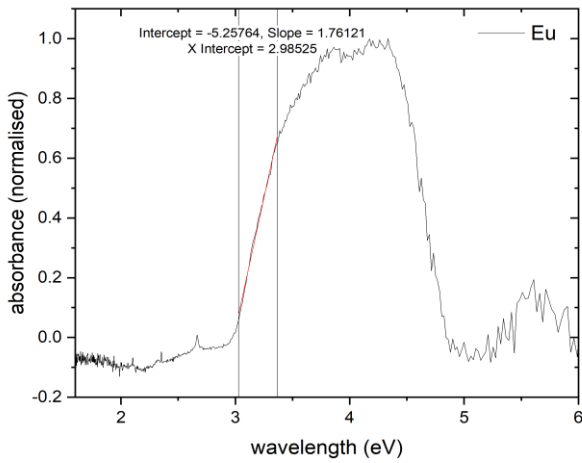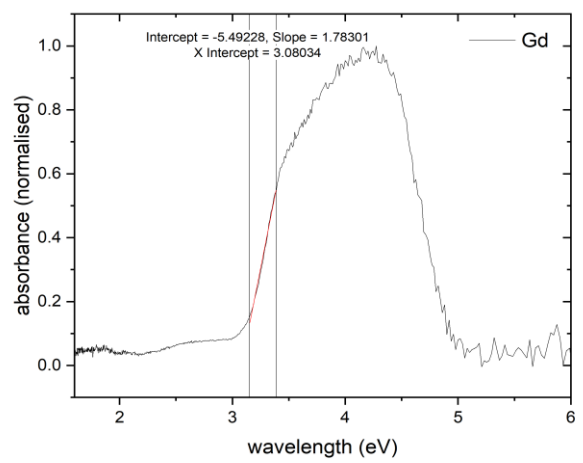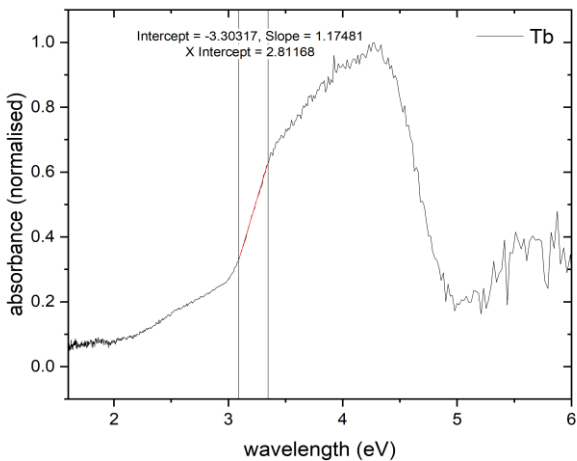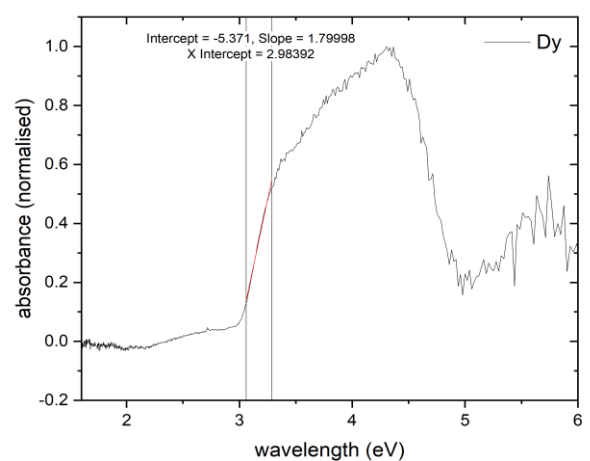

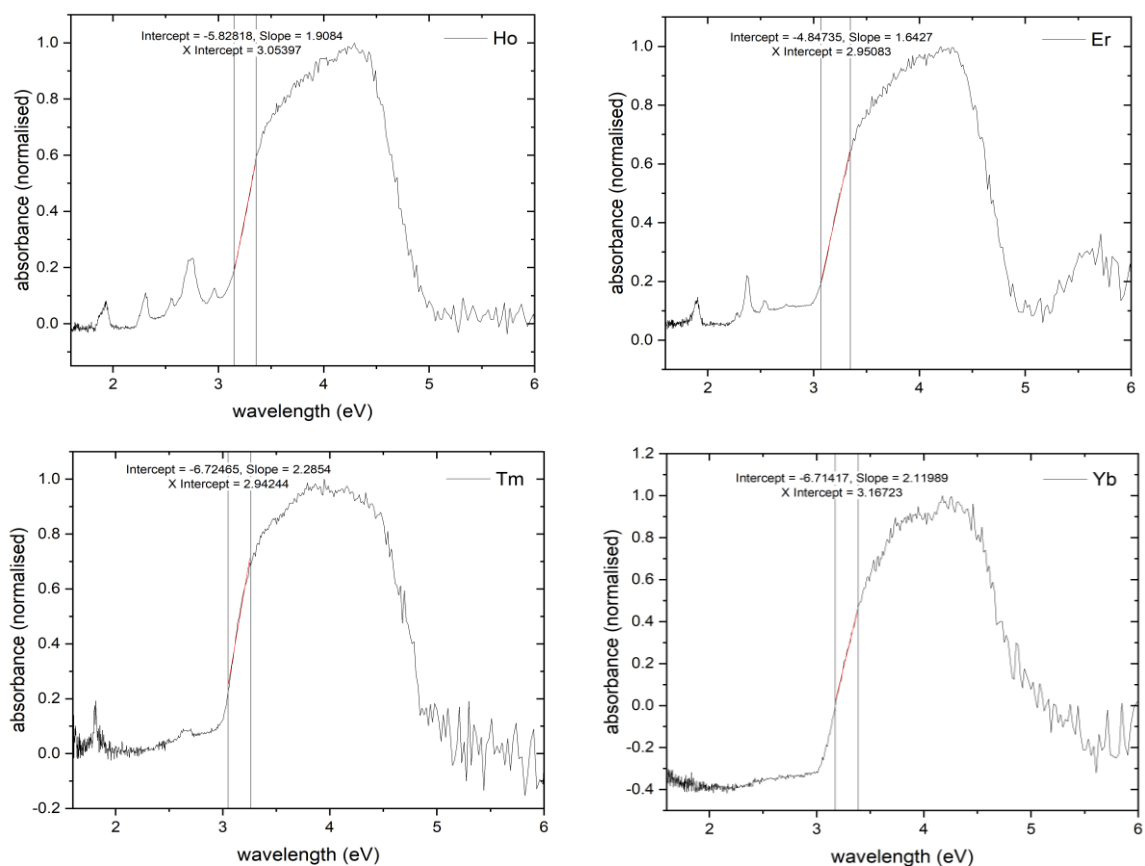

**Figure S23** Solid-state UV-Vis spectra of the decomposed Ln-POT compounds and the linear extrapolation of the main absorption peak (O(p)  $\rightarrow$  Ti(d) in the  $Ti_xO_y$ -framework). The X intercept is taken as an estimate of the band gap of the materials. Errors are estimated to be around  $\pm 0.1$  eV.

In order to compare the band gap results obtained from linear extrapolation of the UV-Vis absorbance spectra to the literature the data were analysed using a direct band gap semiconductor model (Tauc plots).<sup>1</sup> The results are summarised in Table S9.

| Ln | HOMO-LUMO gap solid-state (eV) | Solid-state band gap (eV) |
|----|--------------------------------|---------------------------|
| La | 2.63                           | 3.08                      |
| Ce | 2.46                           | 2.13                      |
| Nd | 3.22                           | 2.81                      |
| Sm | 3.19                           | 2.83                      |
| Eu | 3.22                           | 2.94                      |
| Gd | 3.21                           | 2.90                      |
| Tb | 3.02                           | 2.44                      |
| Dy | 3.19                           | 2.87                      |
| Ho | 3.27                           | 2.87                      |
| Er | 3.22                           | 2.77                      |
| Tm | .*                             | 2.84                      |
| Yb | 3.02                           | 3.09                      |

\*not enough sample was obtained.

**Table S9** HOMO-LUMO gaps for the molecular Ln-POTs in the solid state and band gaps of the decomposed materials (solid state) obtained from Tauc plots. Errors are estimated to be around  $\pm 0.1$  eV.

<sup>1</sup> Y. Lv, J. Cheng, P. D. Matthews, J. P. Holgado, J. Willkomm, M. Leskes, A. Steiner, D. Fenske, T. C. King, P. T. Wood, L. Gan, R. M. Lambert, D. S. Wright, *Dalton Trans.*, 2014, **43**, 8679



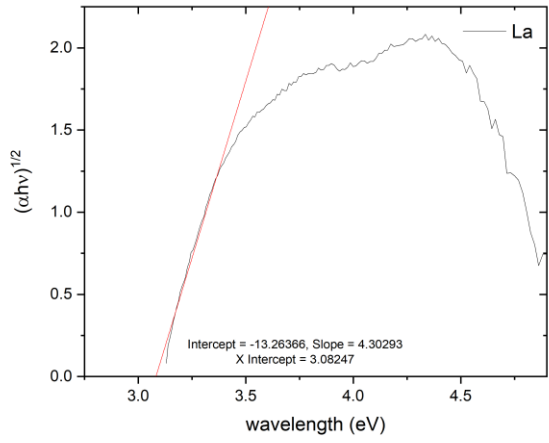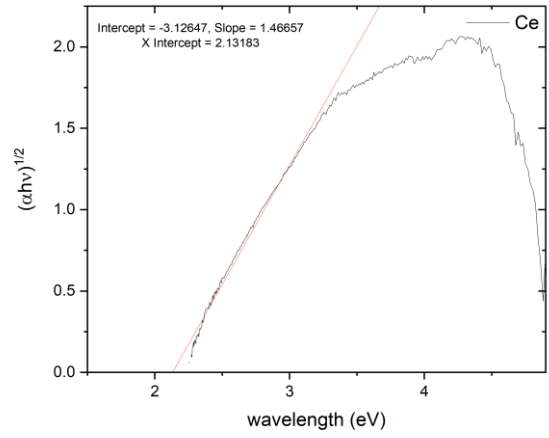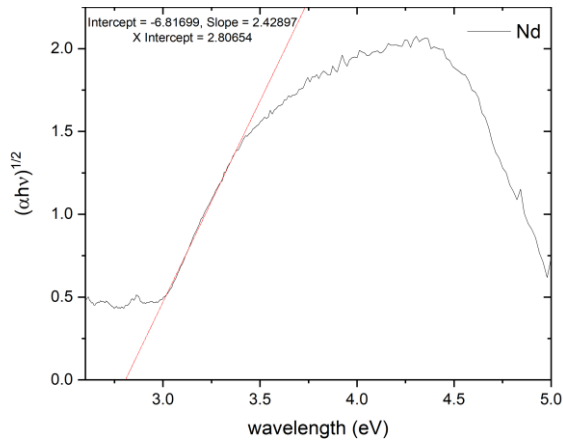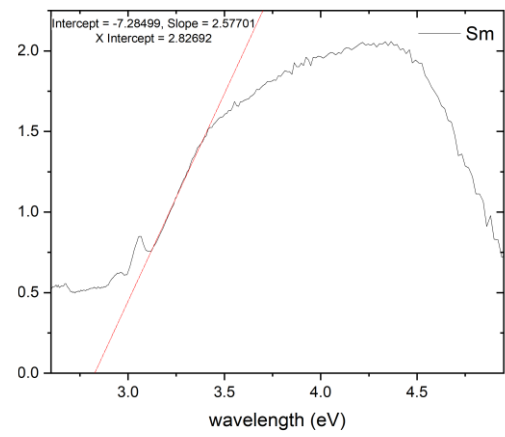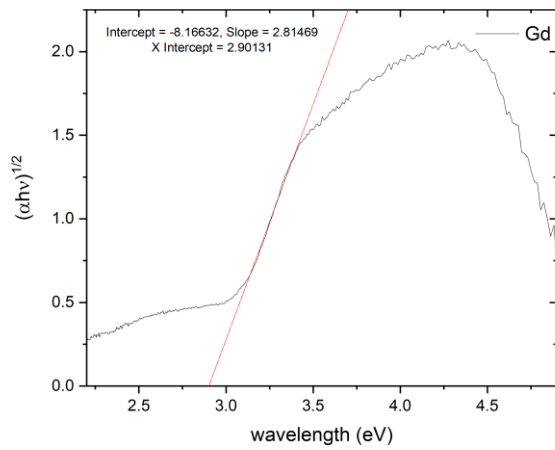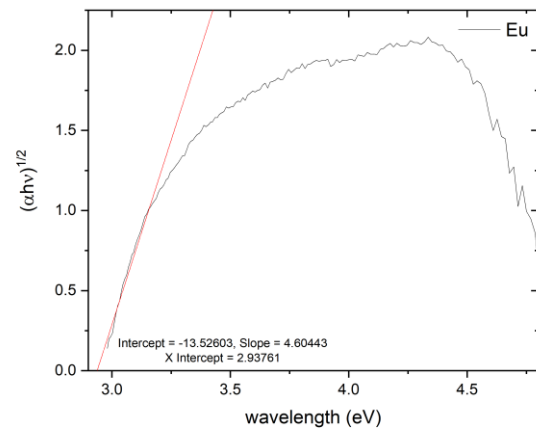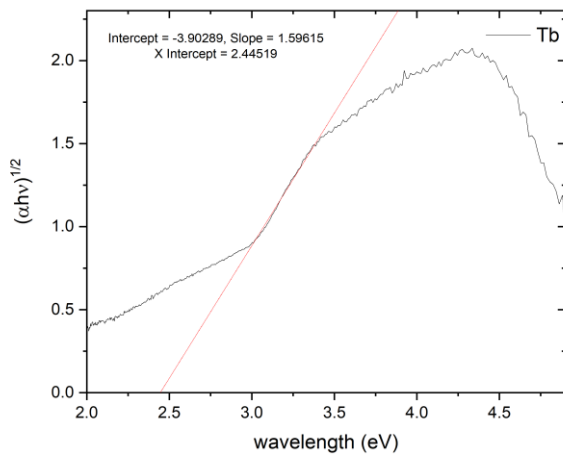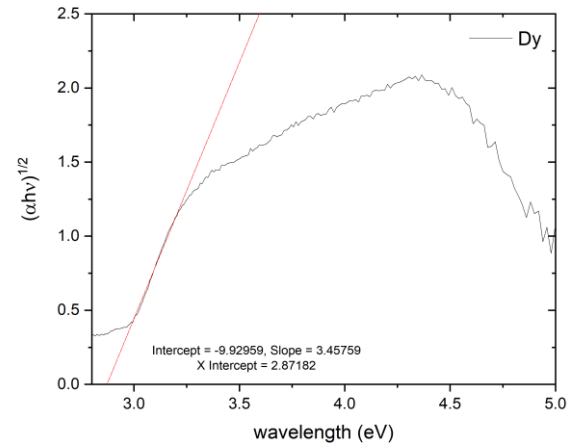

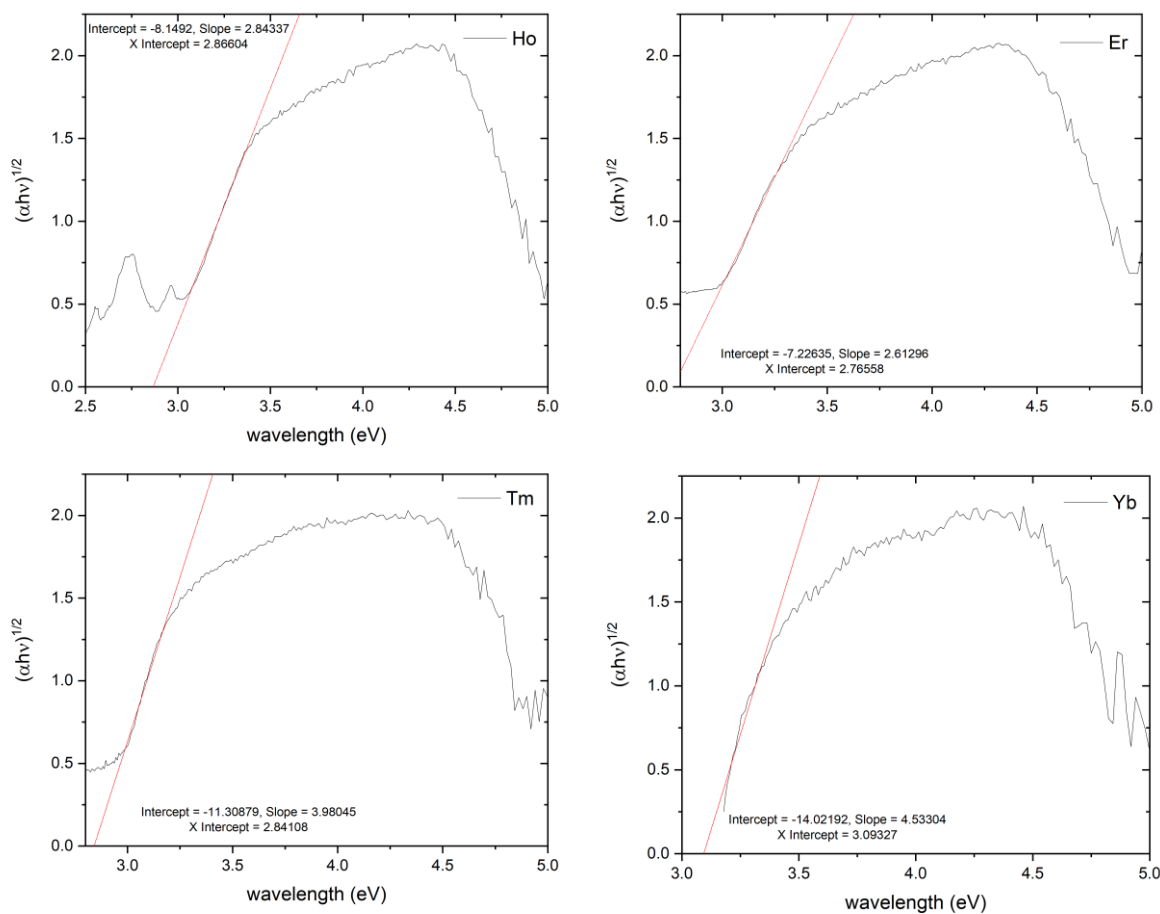

**Figure S24** Band gap determination for the decomposed Ln-TiO<sub>2</sub> materials (solid state) using Tauc plots obtained from plotting  $(\alpha h\nu)^{1/2}$  against the photon energy. Extrapolation of the linear section of the graphs gives the band gap  $E_g$  as the x-axis intercept. A similar analysis was carried out for the Ln-POT cages.
